# Supplementary material for: Towards systematic planning of small-scale hydrological intervention-based research
Source: Copernicus journal article supplement (doi:10.5194/hess-2016-151), 2016-04-14
Supplement: Supplementary file [file hess-2016-151-RC2-supplement.pdf]

# Towards systematic planning of small-scale hydrological intervention-based research

K.E.R. Pramana<sup>1</sup> and M.W. Ertsen<sup>1</sup>

[1]{Water Resources Section, Faculty of Civil Engineering and Geosciences, Delft University of Technology, The Netherlands}

Correspondence to: K.E.R. Pramana (k.e.r.pramana@gmail.com)

## Abstract

Many small-scale water development initiatives are accompanied by hydrological research to study either the shape of the intervention or its impacts. Humans influence both, and thus one needs to take human agency into account. This paper focuses on the effects of human actions in the intervention and its associated hydrological research, as these effects have not yet been discussed explicitly in a systematic way. In this paper, we propose a systematic planning, based on evaluating three hydrological research projects in small-scale water intervention projects in Vietnam, Kenya, and Indonesia. The main purpose of the three projects was to understand the functioning of interventions in their hydrological contexts. Aiming for better decision-making on hydrological research in small-scale water intervention projects, we propose two analysis steps, including (1) possible surprises and possible actions and (2) cost-benefit analysis. By performing the two analyses continuously throughout a small-scale hydrological intervention-based project, effective hydrological research can be achieved.

## 1 Introduction

Small-scale water development initiatives play an important role in supporting sustainable water resources management. Such projects are usually initiated and/or supported by local non-governmental groups, but also by larger donors such as USAID and others (Van Koppen, 2009; ECSP, 2006; Warner and Abate, 2005). Typical small-scale intervention projects include water harvesting development, improving small-scale irrigation schemes, and small dams for water use or hydropower (Lasage et al. 2008; Ertsen et al., 2005; Falkenmark et al.,

1 2001; Farrington et al., 1999). A basic understanding of the local hydrology is typically  
2 required for design, construction and management of small-scale water interventions. Even  
3 though such a hydrological study may be limited in scope – both in terms of time and detail –  
4 it still takes considerable effort performing the study and collecting the data. This holds  
5 especially for building and maintaining (informal) networks and relationships for successful  
6 local data collection (Mackenzie, 2012).

7 Many small-scale water intervention projects, especially those in the so-called developing  
8 countries are located in areas that have been studied less well. In 2003, the International  
9 Association of Hydrological Sciences (IAHS) initiated the Prediction in Ungauged Basins

Move this section  
of text to after the  
PUB reference.  
And try to connect  
the two issues  
better, because  
it's not clear that  
the PUB  
approach avoids  
having to do  
these kinds of

initiative with the objective to promote the development and use of improved  
approaches for a coherent understanding of the hydrological response of ungauged  
by gauged basins (Sivapalan et al., 2003; Hrachowitz et al., 2013). Our hydrological  
remote areas in Vietnam, Kenya and Indonesia were originally in ungauged  
as well. Our approach was based on investigating dominant hydrological  
through a multi-method approach (Mul et al., 2009; Hrachowitz et al., 2011). Our  
ere in short field campaigns within strict financial constraints (compare with Mul et  
Hrachowitz et al., 2011). On-site measurements were highly dependent on the  
18 support of the local communities.

19 Small development activities have been well studied. Phalla and Paradis (2011), Gomani et al.  
20 (2009), and Das et al. (2000) discuss hydrological research and local participation in  
21 interventions to improve decision-making for interventions. In order to implement properly an  
22 intervention, theories and practices of adaptive management have been suggested as potential  
23 beneficial approaches (Fabricius and Cundill, 2014; Beratan, 2014, Von Korff et al., 2012).  
24 Furthermore, local participatory approaches in hydrological monitoring throughout the world  
25 have shown to be potentially effective – e.g. in South Africa, Zimbabwe, and India (Kongo et  
26 al., 2010; Vincent, 2003; Das 2003; Das et al, 2000). However, combined focus on both  
27 hydrological research design/management and local participation in hydrological research has  
28 been rather absent from the literature. Currently, a more systematic overview of issues on  
29 planning hydrological research within small-scale water intervention projects is lacking. This  
30 paper aims to fill this gap.

31 We start with a discussion on human agency within hydrological research, including issues of  
32 participation. Then, we discuss our experiences in our three case studies. These summaries are

1 ~~meant to allow the discussion on scenario development in the third part of this paper where~~  
2 ~~we will discuss the social realities of the projects. We will contextualize the realities with our~~  
3 ~~chosen participation theory and approaches, which will be discussed at a basic level. Finally,~~  
4 ~~we propose how to plan hydrological research in a (surprisingly) surprise-rich context in a~~  
5 ~~systematic way.~~

## 6 **2 Human agency and hydrological research**

7 When we started our projects, not all that were to happen was, or could be foreseen. This  
8 paper is an attempt to make sense of the events afterwards. In doing so, we traced the social  
9 processes relevant for the development of research and intervention in our three cases and  
10 looked for patterns. In the current context, as hydrologists who cannot be separated from the  
11 socio-hydrological world (Lane, 2014), we searched for a better way of conducting small-  
12 scale hydrological research in the future. How can hydrologists make better decisions when  
13 planning hydrological research realizing that humans make decisions on a daily basis that will  
14 affect the intervention development and hydrological research itself? Our objective is to  
15 propose a systematic process of performing hydrological research in small-scale water  
16 intervention projects. We argue that more explicit attention helps to design more appropriate  
17 answers to the challenges faced in field studies. In particular, we propose two related steps:  
18 (1) take into account possible surprises and resulting actions, and (2) using cost-benefit  
19 analysis to analyse the need for certain measurements and assess effects of human  
20 intervention.

21 ~~Humans change landscapes through interventions for many purposes due to human demands~~  
22 ~~(Ehret et al., 2014). Hence, human agency is continuously changing future hydrology, which~~  
23 ~~means we need to build deeper understanding of human-water dynamics (Sivapalan et al.,~~  
24 ~~2014; Ertsen et al., 2014). In our cases, it turns out to be highly relevant to look at the~~  
25 ~~interactions between humans (as initiator and/or stakeholder of intervention and/or research~~  
26 ~~itself) and the complex hydrological system. Likewise, as the interventions influence society -~~  
27 ~~beneficially or not – societal actors (need to) create an awareness and overall understanding of~~  
28 ~~the interventions. Hydrological change usually occurs after a certain intervention has been~~  
29 ~~implemented. On the other hand, societal actors actually interact before, during, and after the~~  
30 ~~intervention. Therefore, potential interactions with possible feedbacks and changes not only~~  
31 ~~show that humans play an important role in determining much of the behaviour of~~

~~1 catchments, but also may already influence hydrology - and consequently society - before the  
2 original hydrological effects of an intervention would have shown themselves.~~

3 Many studies of small hydrological research related to interventions – if available at all –  
4 include human agency in the research through the lens of theft and vandalism (see Kongo et  
5 al., 2010; Mul, 2009; Gomani et al., 2009). When theft and vandalism enter the debate, they  
6 seem to be perceived as simple bad luck, which could happen every time and everywhere  
7 during a research effort. This may be true in itself, but one should be aware that human  
8 interventions in hydrological studies are not always similar to theft/vandalism. Perhaps people  
9 interfere with measuring equipment out of curiosity, or because they simply do not know  
10 what it is. There might be cases when certain agents are against the measurements being taken  
11 in the first place, or are against measurements at a certain location – as will be shown below  
12 when we discuss how motivations of stakeholders to interfere in one hydrological campaign  
13 changed over time, without theft ever being a motivation for action. **Whatever the case,**  
14 **human intervention usually results in lower data availability.** Especially as data sets would  
15 have been relatively limited anyway, studies using such limited data are even more difficult to  
16 be accepted in the scientific research community (compare with Winsemius, 2009).

17 In order to be able to design responses during hydrological studies, we argue that human  
18 agency – **both positive and negative** – should be an integral aspect of designing, performing,  
19 **and evaluating intervention-based hydrological research.** In terms of planning for surprises,  
20 we have found the frameworks, as developed by the RAND cooperation on how to be  
21 prepared when facing “surprises“ in planning, extremely useful. Dewar (2002) (see also  
22 Dewar et al., 1993) discusses such surprises and provides a tool for improving the adaptability  
23 and robustness of existing plans by making assumption-based planning (ABP). With ABP,  
24 one would double-check the planners’ awareness of uncertainties associated to any plan,  
25 including assumptions that might have been overlooked. In addition, research budgets for  
26 small-scale interventions are usually constrained (e.g. Phalla and Paradis, 2011). What to do  
27 with such limited budget, how human action affects research activities and budget, and how to  
28 deal with possibly costly surprises are important questions to prepare oneself for. In terms of  
29 time constraints, a very useful example of how to optimize short-term data is offered by  
30 Hagen and Evju (2013). To understand a certain water intervention, ideally a hydrological  
31 researcher would prefer measurements being conducted at many locations, for a long time and  
32 with high frequency. However, within that general preference and given financial constraints,

1 much remains to be chosen by the researcher (Hamilton, 2007; Soulsby et al., 2008). This  
2 suggests that different researchers would select different actions and measurement techniques,  
3 even when performing a similar type of hydrological research. As such, choices can be  
4 studied in terms of costs and benefits.

5 Despite this potential of looking at uncertainty in planning of small-scale hydrological  
6 research related to human actions, there is still a long way to go. The above-mentioned bias  
7 towards not publishing small-scale studies not only may limit understanding of the hydrology  
8 of small-scale water systems, but it also prevents understanding the nature and performance of  
9 the small-scale studies in relation to the intervention itself. Any intervention can be  
10 understood in terms of cooperation and negotiation between actors in the process of  
11 (re)shaping its design (Ertsen and Hut, 2009). In other words, water planning and  
12 management are typically organised or ‘co-engineered’ by several agencies or actors (Daniell  
13 et al., 2010). This co-engineering will also be the case in shaping the hydrological research  
14 itself – and thus principally the science of hydrology as well.

15 ~~In this paper, we evaluate co-engineering of the hydrological sciences in action. We scan for~~  
16 ~~solutions, explicitly analyse research management in the three cases, and define how it can be~~  
17 ~~improved in practice (see Sutherland, 2014). Daily realities of performing small hydrological~~  
18 ~~studies are our focus. Based on evidence of the effectiveness of our own learning, we~~  
19 ~~contextualize our personal experiences to extrapolate towards general principles how to~~  
20 ~~improve knowledge development for researchers and practitioners (Beratan, 2014). Below,~~  
21 ~~we first discuss the empirical findings from our three field studies.~~ 

## 22 **3 Three small hydrological research projects**

### 23 **3.1 Vietnam Case: Contour trenches for artificial recharge in Ninh Thuan** 24 **Province**

25 Contour trenching is ~~one of the~~ water harvesting techniques implemented to increase water  
26 availability in semi-arid and arid region. A study on trenches in Chile by Verbist et al. (2009)  
27 suggested that few efforts were observed to quantify the positive effect of runoff water  
28 harvesting techniques on water retention. On the other hand, Doty (1972) found that there is  
29 almost no change in soil water between areas with and without trenches. In this study, we  
30 investigated recharge processes of contour trenching.

1 The study area is located in the Phuoc Nam Commune, in the Ninh Phuoc district, with  
2 latitude 11° 27' 46.06" and longitude 108° 55' 44.39" E (Fig. 1). The landscape is a foothill  
3 with an average slope of about 3.5%. It is dominated by mountainous granite and downhill  
4 valley with mix of loamy sand, weathered granite, residual soils and alluvial deposits. The  
5 climate is dominated by tropical monsoons. Generally, the wet season with heavy rainfall  
6 events occurs from September to December. However, from April to May there are  
7 sometimes light rainfall events. The dry seasons are from January to April and from June to  
8 August. The average rainfall is 810 mm year<sup>-1</sup>. Much of the area could be seen as bare soil  
9 with erosion gullies, with some parts covered by cacti and grasses. Initially, contour trenching  
10 of 4 m wide and 1 m deep was planned for an area of 97 ha. At the end of the project, only 22  
11 ha were trenched with a combination of 4 m wide, 1 m deep and 1 m wide, 0.8 m deep  
12 trenches. The research area itself focused on an area of about 8 ha. 

13 We conducted a multi-method approach during a single wet year in 2009. Only during one 6-  
14 month period (June to November 2009) data of rainfall, water levels and groundwater levels  
15 were simultaneously available. On 11 October 2007, before the construction of contour  
16 trenches, we installed two rain gauges (Casella tipping buckets, 0.2 mm, with HOBO data  
17 logger). Infiltrated ponding water in the trenches was monitored daily after rainfall events.  
18 The surface water was measured using a stick and two measuring scales in the trenches. The  
19 subsurface (geology and soil) survey was partially conducted three times, in October 2007,  
20 March 2008, and June 2009. In October 2007, we performed inverse auger tests (Porchet and  
21 Laferrere, 1935) to obtain a range of hydraulic conductivity values. Six locations were  
22 selected from uphill to downhill in the proposed trench area. In March 2008, we drilled 3 m  
23 holes at eight locations for additional lithology investigations. We also took four soil samples  
24 at the trench plots and analyzed those using wet and dry methods at the laboratory of  
25 UNESCO-IHE Delft. In October 2007, we constructed three observation wells; Wells 1, 2,  
26 and 3, at the upstream and middle part of the planned project area. We measured the  
27 groundwater level with divers (Schlumberger Water Services, Delft, The Netherlands).  
28 Because of the loss of two divers in two different observation wells, since February 2008 we  
29 measured groundwater level manually on a 3 to 4-day basis. Moreover, we performed an  
30 isotope study; as such studies on recharge are known to allow improved understanding of  
31 catchment dynamics (Soulsby et al., 2003; Rodgers et al., 2005; McGuire and McDonnell,  
32 2007). From September 2009 to November 2009, 72 water samples were collected in 2 ml  
33 vials. <sup>18</sup>O variation of rainfall, surface water and groundwater were analysed at the Isotope

1 Laboratory of Delft University of Technology. Field measurements and isotope results were  
2 then used in Hydrus (2D/3D) modelling (Šimůnek et al., 2008).

3 ~~We conclude that the combination of field measurements, the isotope technique, and~~  
4 ~~modelling over a 6-month period has given us the understanding of the recharge process in~~  
5 ~~contour trenching plots in Vietnam. Based on the groundwater level measurements and~~  
6 ~~obtained isotope signature in the groundwater, artificial recharge took place in the trench area.~~  
7 ~~From the modelling in Hydrus (2D/3D), the estimated values of parameters used were focused~~  
8 ~~on matching the true scenarios of possible hydraulic conductivities and porosities. Moreover,~~  
9 ~~in the long term, infiltration in the trenches will increase the groundwater levels based on the~~  
10 ~~events during the wet season. The quick groundwater level increase is followed by gradual~~  
11 ~~drawdown during the dry season. For the time being, the trenches seem to benefit short-term~~  
12 ~~subsurface storage.~~

### 13 **3.2 Kenya Case: The impacts of contour trenches in Amboseli, Kenya**

14 In Amboseli, a semi-arid area in Kenya, contour trenching started in 2002. Until recently, the  
15 hydrological long-term impacts of this construction were not well documented. Previous  
16 studies showed impacts of similar water harvesting techniques in different dimensions and  
17 semi-arid areas e.g. Makurira et al., (2010), Singh (2012), Mhizha and Ndiritu (2013). An  
18 attempt was made to answer two research questions on the impacts of contour trenching. First,  
19 what is the impact of trenching on vegetation growth? Second, what is the impact of trenching  
20 on soil redistribution in the trench area.

21 The contour trenching area is located about 30 km downstream of Kilimanjaro Mountain (Fig.  
22 2). It lies at the altitude of 1,245 m, with latitude 2° 46' 57.46" S and longitude 37° 16'  
23 45.93"E. The topsoil is sandy clay with volcanic rock found in deeper layers. The average  
24 rainfall is about 400 mm year<sup>-1</sup>. From visual observation, the study area was eroded and has  
25 an average slope of about 2%. Additionally, it is situated next to an erosion gully, which  
26 originated from Kilimanjaro Mountain. There were two types of trenches; first 1 m wide, 0.8  
27 m deep and second 4 m wide, 1 m deep. From 2002 until recently, a temporary diversion  
28 structure from stones was made to divert upstream rainwater to the whole trenched area.

29 For vegetation growth analysis, two types of satellite images were used; Tropical Rainfall  
30 Measuring Mission (TRMM) and Moderate Resolution Imaging Spectroradiometer (MODIS)  
31 - Normalized Difference of Vegetation Index (NDVI) time series were downloaded freely

1 from <https://wist.echo.nasa.gov/api/> in January 2011. TRMM and MODIS-NDVI monthly  
2 images from January 2002 to December 2010 were used. Those satellite images were  
3 processed using ERDAS Imagine 9.1. The analysis was based on NDVI values by  
4 investigating its increase after the construction of the trenches. In case of success, vegetation  
5 growth should not only increase NDVI values, but also remain high throughout the year. An  
6 independent two samples t-test was used to evaluate the impact of contour trenching to  
7 vegetation growth. NDVI of areas with trench was compared with NDVI without trench. For  
8 soil redistribution analysis, Cesium-137 ( $^{137}\text{Cs}$ ) (Ritchie and McHenry, 1990, Zapata, 2003)  
9 was used. By measuring the concentration of  $^{137}\text{Cs}$  in the vertical distribution, sources of  
10 sediment can be identified (Walling and Quine, 1991; Wallbrink et al., 1999). We sampled  
11 soil with a depth of 40-cm from the soil surface using split tube sampler, Eijkelpamp  
12 Agrisearch Equipment, Giesbeek, The Netherlands. Each point was sampled three times in a  
13 radius of 1-m, mixed into one composite sample (Sutherland, 1994). In total, cesium  
14 concentration of 128 samples was measured at the ISOLAB, Georg-August-Universitaet  
15 Goettingen, Germany.

16 ~~We conclude that the signal of greenness found was most likely due to alternating dry and wet~~  
17 ~~seasons, but does show short-term effect.~~ Furthermore, TRMM is correlated to NDVI where  
18 results show low correlation between TRMM and NDVI. The results of the erosion and  
19 sedimentation analysis show the study area was previously already an eroded area. Sediments  
20 found in the trench area are a combination of local and external sources. Early deposition  
21 originates from local sources, followed by about 30-cm of sediments from external sources.

### 22 **3.3 Indonesia Case: The potential of micro-hydro power plants on Maluku** 23 **islands, Indonesia**

24 Indonesia has an abundance of water resources that can be used to create hydropower as a  
25 valuable source of energy. This study is particularly focusing on Aboru village on Haruku  
26 Island, where the project intended to build a micro-hydro power plant that could improve the  
27 ~~socio-economic situation of the local community~~ (Balakrishnan 2006; Anyi et al. 2010). The  
28 main objective of the research was to map locations with high-energy heads and assess the  
29 minimum available annual discharges for potential micro-hydro in Aboru. The second  
30 research effort aimed at finding potential locations for micro-hydro power plants on the  
31 Maluku islands.



1 The Maluku islands are located in the eastern part of the Indonesia archipelago. In total, there  
2 are 1027 islands. Most Maluku islands are mountainous (about 57%) and are mainly covered  
3 by rainforests. The climate is humid, affected by monsoons and rainfall ranges from 1,000  
4 mm to 5,000 mm year<sup>-1</sup>. The study area is located in a small village with latitude 3° 35' 33" S  
5 and longitude 128° 31' 0.7" E.

6 The potential of micro-hydro depends on two parameters, the river discharge and energy head.  
7 The river discharge was measured uphill of the planned micro-hydro plant. Two divers  
8 (Schlumberger Water Services, Delft, The Netherlands, measurements at 30-minute intervals)  
9 were installed in the river to measure the pressure of surface water levels. To compare the  
10 discharge results, a test using the dilution gauging method (Calkins and Dunne, 1970) was  
11 also performed downstream several times at different locations. Furthermore, similar to a  
12 study by Mosier et al (2012), a Digital Elevation Model (DEM) was used (see Fig.3). Data  
13 was downloaded from <http://srtm.csi.cgiar.org>, which was provided by the Consortium for  
14 Spatial Information of the Consultative Group for International Agricultural Research  
15 (CGIAR).

16 We concluded that Maluku islands have a small potential for micro-hydro power plants.  
17 Extrapolated discharges that can be used range from 0.03 m<sup>3</sup> s<sup>-1</sup> to almost 0.2 m<sup>3</sup> s<sup>-1</sup>. As a  
18 result, available streams with head conditions between 20 to 35 m can produce a minimum of  
19 6 kW and maximum of 40 kW.

#### 20 **4 Human actions towards intervention and hydrological research**

21 In an attempt to look at human actions towards intervention and hydrological research more  
22 systematically, we started by identifying the process of participative actions from local  
23 people. Typically, stakeholder involvement is perceived as – rather than communicating  
24 things to people – seeking partnership in the process of (hydrological) change to affect  
25 knowledge, attitudes and behaviour of participants in a project's network (Ertsen, 2002; see  
26 also Poolman (2011) for a more extensive discussion about stakeholder participation in small-  
27 scale water projects). Motivations for participation, including acts that may not necessarily be  
28 seen as positive by other stakeholders, are a key component, especially when these change  
29 over time – as we demonstrate below for our Vietnam case. However, there is little  
30 recognition of motivations of individuals over time in the literature (see Cleaver (1999) and  
31 Leahy (2008) for some attention to this issue).

1 For our three cases (see for the timeframes Table 1), we have drafted our own categorization  
2 of human actions in intervention and hydrological research. In each of the interventions in  
3 Vietnam, Kenya and Indonesia, local stakeholders of different kinds were engaged (see  
4 Appendix A, Table A.1-A.6). This engagement included the hydrological research, especially  
5 where it was part of the intervention itself. Our analysis will focus on community  
6 participation, including what went differently than expected and the issue whether in the  
7 future such developments could be anticipated upon. Based on the results, we develop  
8 suggestions how hydrological researchers can include considerations on human agency when  
9 planning and performing field research.

10 Human agency in intervention and research can be related to existing theories on community  
11 participation. There are many participation theories; Arnstein (1969) introduced the ladder of  
12 participation for urban development where the scale was from non-participation to being able  
13 to make decision (citizen empowerment). The scale influenced other fields and was further  
14 developed, for example by Choguill (1996). Her ladder of participation was based on the scale  
15 of willingness of government in community projects. One recent participatory spectrum is  
16 IAP2 (2007), where along the spectrum the impact of public participation increases. Another  
17 participation framework during intervention phase was proposed by Srinivasan (1990), where  
18 this was meant for training trainers in participatory technique. We found this last approach  
19 useful in analysing our case studies, as the community participation scale from Srinivasan  
20 (1990) allows for differentiating attitudes towards change, by sorting them along a scale  
21 showing varying degrees of resistance or openness (see Fig. 4). Therefore, we found this  
22 potential to “measure” attitude even more interesting because our results suggest that these  
23 attitudes of stakeholders change over time, during the intervention and research itself.

24 As an example, we use the Vietnam case to gain an overview how the local community  
25 participated in the intervention phase and how this altered over time. At the beginning of the  
26 project, none of the landowners agreed with the intervention, especially because they had not  
27 yet seen a successful example in their particular area. After negotiations, a monk organization  
28 was willing to provide their land as an example case [#6A]. And after the large trenches were  
29 constructed, the monk organization did not like the design. The rejection of the large trenches  
30 enforced the proposer to reconsider the trench dimensions. Thus, the proposer came up with a  
31 smaller design of contour trenches. Despite the smaller design, the monk organization still  
32 refused to continue implementing the new design on its remaining land. Consequently, the

1 proposer introduced the smaller design to other farmers and one farmer accepted it. The  
2 smaller trenches were then implemented in one farmers' area. The acceptance of the smaller  
3 design by other farmers continued. Farmers living nearby requested also the small trenches to  
4 be constructed on their land. After the monks' organization saw the results at several farmers'  
5 land, the monk organization eventually requested the proposer to construct small trenches on  
6 their remaining land. The decision of local people who wanted to have contour trenches  
7 occurred after seeing an example of a smaller design. The implemented scale of the above  
8 community participation (Srinivasan, 1990) can be seen in Fig. 5 where:

- 9 • 0 to 6; among many landowners, only a monk organization was willing "to try some  
10 actions" on their land.
- 11 • 6 to 3; the monk organization was sceptic and "have doubts" if they continue  
12 implementing the trenches, even with a smaller design.
- 13 • 3 to 6; a farmer was willing "to try some actions" on his land.
- 14 • 6 to 7; from one farmer with smaller trench design, he advocated change so that the  
15 acceptance of the smaller design continued in this particular area.

16 Since we were not involved during the intervention phase in the Kenya and that the Indonesia  
17 case resulted to cancelation of field intervention, only the community participation in  
18 hydrological research will be analysed in the remainder.

### 19 **Categorization of human actions in hydrological field research**

20 ~~Within the context where intervention was done simultaneously with hydrological research –~~  
21 ~~the Vietnam case [#6] – the actual shape of the final intervention was decided upon within~~  
22 ~~several rounds of discussions between project team and local communities. Agreement was~~  
23 ~~obtained through a negotiation process. The actual shape of the hydrological research was~~  
24 ~~heavily dependent upon knowing the definitive location of the intervention. While the~~  
25 ~~decision process took place, measurements were conducted in the vicinity of the possible~~  
26 ~~locations of the intervention. On-site measurements had to be re-evaluated from time to time~~  
27 ~~due to changes of intervention locations. The intervention period and financial support for~~  
28 ~~research were both limited and limiting as well. Most likely, in conditions of simultaneous~~  
29 ~~intervention and research, changes required adjustments to a new setup, which often means~~

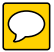

~~1 increasing financial expenditure for measurements. Therefore, any decision to start either  
2 intervention or hydrological research needs careful thought.~~

3 In general, we find different processes of involvement and different human actions related to  
4 the three hydrological research projects (see Table 4a, on events labelled with [#]). For  
5 example, in Vietnam and Kenya, access tubes [#3, #9A] were taken away. Also, in Vietnam  
6 the Divers were taken away [#4]. In Kenya, one rain gauge was damaged by elephants, and  
7 afterwards removed by local people [#7]. Next to human agency affecting the hydrological  
8 research, other events affected the research activities. In Vietnam, one rain gauge clogged  
9 [#1] because of fine sands from strong winds, and the screen of the observation wells [#5]  
10 proved to be not suitable for local conditions. Obviously, these events could have been  
11 avoided. Rain gauges could have been checked and maintained on a regular basis, especially  
12 when realizing that local conditions and climate might affect the measurement. When  
13 planning to conduct isotope analysis, observation well structures should have been  
14 constructed for a proper sampling. However, there were also problems that probably could not  
15 have been avoided, especially technical failures of data loggers [#2, #8, #10, #11] from  
16 tipping buckets and divers.

17 Table 2b also provides the detailed results in terms of timing and type of human actions  
18 during intervention processes. For example, the Vietnamese intervention could only be  
19 constructed after many negotiations between the proposer and the end users. Such a decision  
20 could change the final location of the intervention, which in turn affected directly the  
21 hydrological research. In the Vietnam case, intervention design and location were determined  
22 by the local people, who had the power to choose their preference of intervention and decided  
23 whether it could be implemented on their land or not. In the Kenyan case, intervention design  
24 and location were simply accepted by the local Maasai and decisions were made by KWS. In  
25 this case, the intervention existed first and was evaluated later. In addition, negotiating about  
26 reasonable labour costs for the field study in 2010 resulted in lack of local assistance for soil  
27 moisture measurements. In the Indonesian case, the intervention was not, as was preferred  
28 before, an outcome as a recommendation from the hydrological research. The end user of the  
29 intervention shifted from a pilot at a village to a micro hydro model at a local university. The  
30 intervention was cancelled due to insufficient funding, even when the hydrological research  
31 went smoothly.

1 The Srinivasan scale allows for analysing the changes in attitudes and possible actions  
2 concerning an intervention over time. However, the scale seems to be less relevant for the  
3 hydrological research itself, which is actually interesting as it suggests that stakeholders may  
4 have different attitudes and ideas with respect to interventions. To what extent this motivation  
5 is always directly linked to an attitude towards the intervention, remains an open question. An  
6 example is the Vietnam case, where access tubes and divers were taken away. Possible  
7 reasons are that someone rejected the project, did not want any intervention to be constructed  
8 on the land, had negative impressions of the intervention, or was not satisfied with the  
9 proposer's offer. On the other hand, the attractiveness of the device itself and/or curiosity  
10 could make people eager to have such devices. Therefore, the resulting human action to  
11 remove the device may not have been a rejection of the project at all, but just a desire to own  
12 a device with a unique appearance.

## 13 **5 Planning for surprises in hydrological research**

14 In all our three case studies, we conducted different measurement techniques depending on  
15 the research objectives. What all case studies had in common was that the projects had to be  
16 changed due to local negotiations. No matter the scale of either stakeholders' participation in  
17 hydrological research or their motivations, one will have to face human actions –  
18 disappearance of measurement devices, changes of locations, etcetera – when designing field  
19 research. The events could have been anticipated – or even (partially) avoided - but usually  
20 were treated as surprises or unforeseen side-effects. Learning from our own experience, we  
21 claim that they should at least be anticipated. For example in the Vietnam case, when the  
22 divers disappeared, a stronger cover for the observation wells might have been used. In the  
23 Kenya case, a more secure location for some devices could have been prepared to cope with  
24 communities outside the research area (“third party surprises”). The RAND studies provide  
25 guidance for an approach that anticipates on known surprises (Dewar, 2002). In planning for  
26 surprises, as outcomes of local negotiations are not known before, we envision that a  
27 hydrological field researcher prepares the study by taking into account several scenarios.  
28 Thinking in scenarios for hydrological fieldwork instead of one single approach allows for  
29 making decisions based on expected implications of events on the hydrological results, and  
30 should minimize the costs of improvisation.

31 We developed three research budget scenarios for the three cases, where we defined  
32 effectiveness in terms of process understanding and important model input. First, we

1 evaluated the technical approaches per case study (see Table 2-4) in terms of performance  
2 (Blume et al., 2008), which is the effectiveness of measurements in understanding  
3 hydrological processes. Then, expenditures included in our (fictitious) budgets are labour and  
4 financial costs, which are shown in ranges of Euros; (+-) is between 0 to 50 Euro, (+) 50 to  
5 250 Euro, (++) 250 to 750 Euro, and (+++) above 750 Euro. These ranges are given as  
6 examples to illustrate the expenditures.

7 Either collecting more data and/or different data is usually the choice we have to make to  
8 confirm certain underlying dominant hydrological processes due to an intervention. We used  
9 cost-benefit analysis (Sassone, 1978) in research scenarios that were developed based on the  
10 Delphi method (Linstone and Turoff, 1975). Each scenario specifies a budget; the  
11 measurements that can be conducted within that budget, and the dominant hydrological  
12 processes studied. In changing the budgets, we could explore changes in and differences  
13 between probable field campaigns, especially in gaining better understanding of dominant  
14 mechanisms of the intervention.

## 15 **5.1 Scenarios**

16 We tested the scenario approach with a group of experts. We offered three scenarios. Scenario  
17 1 was approximately at the lowest budget, which was estimated by considering the  
18 experiences gained by the author. As it was already known how the research went, the lowest  
19 cost scenario was drafted by eliminating the measurements that failed or were not used in the  
20 analysis. This combined at least a desk study with field measurement data. Also, this was a  
21 theoretical baseline scenario for good understanding of the intervention.

22 Scenarios 2 and 3 covered a longer research period. Extension of measurement and  
23 performing other methods were proposed. There were several options related to parameters  
24 that were selected and added, with various spatial and temporal combinations. Those options  
25 were:

- 26 A. Extension of the measurement period.
- 27 B. Additional samplings.
- 28 C. Additional measurement devices.
- 29 D. Additional analysis.

1 Option C and D are connected since having another type of measurement might use the same  
2 or require a new (commercial) software program or service.

3 Scenario 2 was included a budget increase of about 20%. Options for an extension of the  
4 measurement period and more samplings were preferred.

5 Scenario 3 used an approximately 80% budget increase. It implies a condition with an  
6 expansion of the second scenario combined with much more room for additional parameters  
7 in the field campaign.

8 Some assumptions for the budgeting were set as follows:

- 9 • Related research budget components like field personnel, transportation to the site,  
10 meals, and accommodation were not considered.
- 11 • A researcher was categorized as non-paid labour in the research area, since s/he  
12 receives salary from the researcher's institution. Thus, the researcher's expenses were  
13 ignored.
- 14 • Shipping cost of devices and samples, taxes of research devices, and research permit  
15 costs were excluded.
- 16 • There were no subsidies from research institutions for measurements devices or  
17 models.
- 18 • None of the scenarios took into account decisions made for a particular intervention  
19 and its development.

20 For Scenarios 2 and 3, the end results of possible field campaigns and analysis were discussed  
21 with ten experts from different Dutch institutions, who were selected from the working  
22 environment of the author. Each scenario had its own specific hydrological objective that fits  
23 to an expertise (i.e. hydro-geology, hydrology, remote sensing), but the experts had different  
24 hydrological backgrounds. The implemented research with the results and proposed scenarios  
25 of several field campaigns were explained to the experts to clarify the content and objective of  
26 the research. Subsequently, they had to grade the scenarios based on the level of additional  
27 understanding (if any) that would be achieved. The required budget itself was not mentioned  
28 to allow experts to objectively value the proposal without any economic consideration. The  
29 author picked the Dutch grading scale as follows:

- 30 • 1-5,5 = little understanding of the relevant mechanism of intervention

- 1 • 6-7,5 = good understanding of the dominant mechanism of intervention
- 2 • 8-8,5 = better understanding of the dominant mechanism of intervention
- 3 • 9-10 = complete (full process) understanding of the mechanisms relevant for the
- 4 intervention

5 In the last part of the interview, the experts were also given the opportunity to provide their  
6 own alternative approaches that could result in better understanding.

7 Even though this was a theoretical exercise and that it was not easy to provide clear-cut  
8 evidence for the scenarios to be realistic enough, results are useful. There may be many other  
9 options of optimization, such as cheaper measurement devices and modelling. Different  
10 research institutions prefer different measurement devices, or software developed by certain  
11 institutions. Research institutions might already own measurement devices and software, thus  
12 do not want to spend money on others. This specific setup is merely an estimation in the  
13 context of the three case studies and may well vary from person to person due to people's  
14 preference. However, by asking ten experts for their input and analyze further their responses  
15 over the entire width of the scenarios, a good degree of objectivity, certainty and reality can  
16 be reached, if not in absolute, then at least in comparative terms. Our results are given in Fig.  
17 6. We discuss the Vietnam case in more detail.

## 18 **5.2 Vietnam case**

19 The lowest budget for having sufficient understanding of groundwater recharge gained in the  
20 actual research is reduced to almost 70% of the expenses during implementation (see Table  
21 B.1). Rainfall measurement is a must for the input of the model. The hydraulic properties of  
22 soil and infiltration tests are important as well. The water level measurement is required to get  
23 the ponding in the trench correctly. These costs are not much compared to other  
24 measurements. Soil moisture measurement is removed from the field campaign since it is not  
25 only expensive, but also the access tubes are prone to be taken away by the local people.  
26 Isotope tracers are excluded, because the constructed observation wells were not suitable for  
27 groundwater sampling. In addition, the cost for this analysis is considered to be expensive. On  
28 the other hand, isotopes are beneficial and will provide signals as long as the observation  
29 wells would be better constructed. A minimum of three observation wells are set, since it is  
30 the minimum or triangle layout to get an idea on the groundwater flow direction. A short but



1 sufficient period of measurements would be during the wet season, where the trench may be  
2 filled with rain water.

3 Even though the cost reduction is significant, the conditions to apply these methods could  
4 remain uncertain. For example, when a researcher made a plan for scheduling the starting  
5 point of measurement at the beginning of a wet season, no one would expect at first that  
6 negotiating with the local community was difficult, even though this determines whether or  
7 not the intervention can be built or continued. There has to be willingness from the  
8 community to provide land for the intervention. After several discussions and meetings, a  
9 local to local approach was needed to convince stakeholders that the intervention would be  
10 beneficial to the local community. However, no one could predict when and where it could be  
11 realized. If the decision to be made for construction was delayed, the plan for hydrological  
12 measurements would have to wait until the next wet season, which would have been one year  
13 later. And if there is a tension to install the measurement devices for a “with and without”  
14 analysis, and the location shifts in time, new measurement set ups have to be adjusted. These  
15 conditions will result in loss of data and time for the hydrological research. As such, the  
16 minimum budget is somewhat artificial. The other way around, the big difference between the  
17 minimum budget and the actual budget suggests that in the Vietnam case, negotiations on the  
18 intervention brought along high costs.

19 When more budget would be available, scenario 2 (see Table B.2) could expand the  
20 implemented program by constructing one new observation well and its groundwater level  
21 measurements. Also the sampling period for isotope tracer is added. The observation well  
22 should be placed in line with the existing wells and its screen should be along the pipe, from  
23 near soil surface to the bedrock. It would be expected that the recharge can be more apparent  
24 where the signal of infiltrated rainwater can directly infiltrate into the pipe. Thus, the  
25 groundwater fluctuation and sampling can confirm the result of the implemented research.

26 In scenario 3 (see Table B.3), an 80% increased budget gives options for more applications  
27 and/or more advanced methods. Besides one new observation well and isotope samplings,  
28 three other wells should be constructed. The observation wells should be placed at the small  
29 trench area. A possible advanced measurement is by performing an Electrical Resistance  
30 Tomography (ERT) survey for subsurface imaging. Several cross sections of the subsurface  
31 could be obtained during the dry and wet period. By having these new wells combined with

1 the analyzed ERT data, the hypotheses could be made more pronounced regarding the  
2 difference in groundwater behaviour with and without the intervention structure.

### 3 **5.3 Interviews with experts**

4 The results of the interviews with the experts can be seen from Table C.1-C.3. Of the three  
5 cases, the Vietnam case had most options, due to better financial conditions, compared than  
6 the other two cases. Considering scenario 2, 70% of the experts believe an additional well and  
7 a 1-year continuation of the groundwater level measurements, including isotope samplings  
8 and analysis, would result in similar data collection as in the implemented research. One  
9 expert considered that extra data might even lead to confusion. Another period of 1-year data  
10 could be used for validation, thus might give more confidence. A very long data series, from  
11 two to about ten years of groundwater level measurement would be very beneficial for better  
12 understanding the mechanism of the recharge. In the Kenya case, 60% of the experts value the  
13 outcomes of additional soil moisture measurement, extension of rainfall and NDVI images as  
14 similar to the implemented research. The remaining 40% think that new soil moisture  
15 measurements could lead to additional understanding. For Indonesia, 90% of the experts think  
16 that the result of extending discharge measurement will not increase understanding. However,  
17 one expert says new data matter, as measurements could have been made during a very dry or  
18 very wet year.

19 In Scenario 3, with 80% increase in budget, the value of measurements points to similar  
20 results as in Scenario 2, with some additional elements. For Vietnam, 80% of the experts say  
21 that Electrical Resistivity Tomography (ERT) measurements could increase the understanding  
22 of mechanism of the recharge and provide more explanation of the disconnected groundwater  
23 system. Thus, it could potentially confirm the groundwater profile and the groundwater level  
24 during recharge. Performing ERT either during dry or wet seasons sometimes yields results  
25 hard to interpret, since ERT is a static measurement. In the Kenya case, 70% of the experts  
26 say adding higher resolution of 10 m might be sufficient to capture the greenness of the  
27 trenches. The images could be of importance to see a hypothetically constant greenness  
28 signal. Finally, for the Indonesia case, as a micro-hydro installation usually requires a  
29 minimum annual discharge, a long-term discharge will be used for discharge statistics.  
30 Finally, 60% of the experts believe that more discharge measurements at different locations  
31 with different soil types, geology, and land uses, could improve our understanding, especially  
32 the discharge response of different catchments on different islands.

1 In summary, a research plan with 20% increased funding (Scenario 2) appears to obtain  
2 similar understanding as the reference result. On the other hand, an 80% increase in funding  
3 may be capable of gaining a better understanding. A costly research plan for a small-scale  
4 intervention project may not be economically feasible and thus impossible to implement.

## 5 **6 Towards systematic planning**

6 Despite all the problems we encountered in the three field research projects, we could develop  
7 a good understanding of the hydrological impacts of interventions in three different  
8 developing countries. In Vietnam, during the wet season, contour trenches contribute to  
9 recharge, but only for short-term impact, up to two months. In Kenya, vegetation growth in  
10 the trench area as reflected in the signal of greenness index was most likely due to the wet  
11 season, without a clear long-term effect from the trenches. In Indonesia, the potential of  
12 micro-hydro capacity on Maluku islands ranges from 6 to 40 kW. In the three cases local  
13 people participated during the implementation of the projects, both in the intervention and  
14 hydrological research. As a result, the field campaigns were not perfect in terms of  
15 hydrological standards. Measurement devices were damaged, removed, disappeared or not  
16 located at the final intervention. In the end, we ended up with less data or data of lower  
17 quality. Local participation and financial constraints forced us to deal with research and  
18 intervention as interacting with and affecting each other.

19 As this setting is not unique to our three small cases, balancing intervention and research is a  
20 general challenge. Tracing back the social reality and the way it shapes research and  
21 intervention with the associated budget allowed us to gain more insight into trade-offs  
22 between hydrological knowledge and hydrological research management. Based on our  
23 experiences, we propose that planning ahead is possible. We propose a new systematic  
24 perspective on how to prepare hydrological research for a more effective way to implement  
25 small-scale water intervention research projects. Being prepared for and responsive to  
26 surprises due to human actions can be achieved by developing scenarios that combine  
27 hydrological issues with cost-benefit analysis. Considering financial costs and specific  
28 research objectives of small-scale interventions, options for field campaigns and analysis that  
29 could answer the research questions can then be defined.

30 Baiocchi and Fox (2013) suggest six key issues to be prepared for and respond to surprises;  
31 (1) learn from experience: attract and retain the most experienced people, (2) address the  
32 negative effects of surprise, (3) assess the level of chaos in the work environment, (4) prepare

1 for “third-party surprises”, (5) focus on building a network of trusted colleagues, and (6)  
2 conduct regular future-planning exercises. Their recommendations confirm our ideas:  
3 planning for surprise requires proper understanding of small interventions within their  
4 hydrological context and incorporating interdisciplinary knowledge, learning, and local  
5 participation (see Karjalainen et al., 2013; Rodela et al., 2012; Reed et al. 2010).

6 Similar to balancing development and conservation (Garnett et al., 2007), when financial  
7 constraints – and usually time as well – become important, a researcher should be able to  
8 balance what he/she can and cannot do. Since budgets and time for a small-scale intervention  
9 are limited, research should be well planned. In order to include the costs of performing  
10 hydrological studies and the efficiency (effectiveness) in planning for surprises, we discussed  
11 an approach applying cost-benefit analysis. Despite its simplicity, it appears to be a good way  
12 to quantify research efforts versus the (probable) outcomes.

13 The judgments of the outcomes were obtained from interviews with water experts. Sharing  
14 options with other experts adds value to the preparation. Each scholar has their own  
15 preferences, and thus there is no single solution. This was shown during the interviews with  
16 the experts, when they were forced to make a choice by pushing their preference in grading  
17 the available field campaign options. Eventually, even when incorporating experts’ inputs, we  
18 will still have to make decisions and will possibly select our own preferred choices. In the  
19 end, dealing with the local constraints is a decision to be made by the researcher. However, by  
20 doing the two analyses of scenarios and cost benefits continuously during planning and  
21 performing hydrological research, one will be better informed to make decisions.

22 The notion that the effects of human actions to be expected in hydrological field campaign are  
23 basically unspecified does not imply that they could not adequately and fruitfully be  
24 translated in specific planning, as we have shown. Taking into account human actions in  
25 planning field campaigns for something that is usually seen as a single-scientific activity  
26 implies that each field design should be tuned to the situation under consideration. A designer  
27 cannot come up with a standard solution and may experience different stages of learning  
28 processes that continue to shape both intervention and hydrological research (see Fig. 7).  
29 Paradoxically, introducing such a multifaceted approach asks for hydrological researchers  
30 with higher qualifications. Planned improvisation needs scientific expertise, as much as it  
31 requires a specific attitude.

32

1 **Appendix A: Participative Actions from Local People**

2 **Appendix B: Cost Scenarios**

3 **Appendix C: The experts' opinions**

4

5 **Acknowledgements**

6 The authors would like to thank the funding agencies and key people for their support in each  
7 of the three small-scale water projects; Royal Haskoning Vietnam, Marieke Nieuwaal, and  
8 local partners, both from the community and the Vietnamese government; International  
9 Foundation for Science, Sweden, Dr. Cox Sitters (Moi University, Kenya), Dr. Jeannis-Nicos  
10 Leist (University of Goettingen); the Dutch Ministry of Economic Affairs, Agriculture, and  
11 Innovation, and the project consortium (Noes Tuankotta, UKIM and IBEKA). We also would  
12 like to thank the local people who helped us in the field for technical and logistic assistance,  
13 but are not mentioned here one by one. Lastly, we thank the ten water experts for their  
14 participation in the interviews.

15

1 **References**

2 Arnstein, S. R.: A Ladder of Citizen Participation, *Journal of the American Institute of*  
3 *Planners* 35, 216, 1969.

4 Anyi, M., Kirke, B., and Ali, S.: Remote community electrification in Sarawak, Malaysia,  
5 *Renewable Energy* 35(7): 1609-1613, 2010.

6 Baiocchi, D. and Fox, D. S.: *Surprise! From CEOs to Navy SEALs: How a Select Group of*  
7 *Professionals Prepare for and Respond to the Unexpected*, RAND, 2013.

8 Balakrishnan, B.: *Women and Micro-hydro Systems*, Himalayan Small Hydropower Summit,  
9 New Delhi, 2006.

10 Beratan, K. K.: Summary: addressing the interactional challenges of moving collaborative  
11 adaptive management from theory to practice, *Ecology and Society* 19(1): 46.  
12 <http://dx.doi.org/10.5751/ES-06399-190146>, 2014.

13 Blume, T., Zehe, E., Reusser, D. E., Iroume, A., and Bronstert, A.: Investigation of runoff  
14 generation in a pristine, poorly gauged catchment in the Chilean Andes I: A multimethod  
15 experimental study, *Hydrological Processes*: doi: 10.1002/hyp.6971, 2008.

16 Calkins, D., and Dunne, T.: A salt tracing method for measuring channel velocities in small  
17 mountain streams, *Journal of Hydrology* 11: 379-392, 1970.

18 Cleaver, F.: Paradoxes of participation: questioning participatory approaches to development.  
19 *Journal of international development*, 11(4), p.597, 1999.

20 Choguill, M. B. G.: A Ladder of Community Participation for Underdeveloped Countries,  
21 *Habitat International* 20 (3): 431-44, 1996.

22 Daniell, K. A., White, I., Ferrand, N., Ribarova, I. S., Coad, P., Rougier, J.-E., Hare, M.,  
23 Jones, N. A., Popova, A., Rollin, D., Perez, P., and Burn, S.: Co-engineering participatory  
24 water management processes: theory and insights from Australian and Bulgarian  
25 interventions, *Ecology and Society* 15(4): 11,  
26 <http://www.ecologyandsociety.org/vol15/iss4/art11/>, 2010.

27 Das, S. V. G. and Rao, P. S.: Participatory Hydrological Monitoring (PHM) - An effective  
28 tool for community managed groundwater systems? Paper presented at the International

1 Conference on Land Resource Management for Food, Employment and Environmental  
2 Security. 9-13 November 2000. Vigyan Bhavan, New Delhi, 2000.

3 Das, S. V. G: Judicious Management of Groundwater through Participatory Hydrological  
4 Monitoring, A Manual, APWELL Project, Andhra Pradesh, India, 2003.

5 Dewar. J. A, Builder, C. H., Hix, W. M., and Levin, M. H.: Assumption-based Planning, A  
6 Planning Tool for Very Uncertain Times, RAND, 1993.

7 Dewar. J. A: Assumption-based Planning, A Tool for Reducing Avoidable Surprises, RAND,  
8 Cambridge University Press, 2002.

9 Doty, R. D.: Soil water distribution on a contour-trenched area, US Department of Agriculture  
10 Forest Service. Research Note INT-163: 6 p, 1972.

11 ECSP: Water Stories: Expanding Opportunities in Small-scale water and sanitation projects,  
12 Report from the Navigating Peace Initiative of the Environmental Change and Security  
13 Program, Woodrow Wilson International Center for Scholars, Washington, 2006.

14 Ehret, U., Gupta, H. V., Sivapalan, M., Weijs, S. V., Schymanski, S. J., Blöschl, G., Gelfan,  
15 A. N., Harman, C., Kleidon, A., Bogaard, T. A., Wang, D., Wagener, T., Scherer, U., Zehe,  
16 E., Bierkens, M. F. P., Di Baldassarre, G., Parajka, J., van Beek, L. P. H., van Griensven, A.,  
17 Westhoff, M. C., and Winsemius, H. C.: Advancing catchment hydrology to deal with  
18 predictions under change, *Hydrol. Earth Syst. Sci.*, 18, 649-671, doi:10.5194/hess-18-649-  
19 2014, 2014.

20 Ertsen, M. W.: The technical and the social in engineering education. In: Frascara J. (ed)  
21 Design and the social sciences. Making connections. Taylor and Francis, London, 146-157,  
22 2002.

23 Ertsen, M. W., Biesbrouck, B., Postma, L., and van Westerop, M.: Participatory design of  
24 sand storage dams. In: Goessling T., Jansen R.J.G. and Oerlemans L.A.G. 2005 Coalitions  
25 and Collisions, Wolf Publishers, Nijmegen, pp 175-185, 2005.

26 Ertsen, M. W. and Hut, R.: Two waterfalls do not hear each other. Sand-storage dams, science  
27 and sustainable development in Kenya, *Physics and Chemistry of the Earth, Parts A/B/C*, 34  
28 (1-2): 14-22, 2009.

1 Ertsen, M. W., J. T. Murphy, L. E. Purdue, and T. Zhu: A journey of a thousand miles begins  
2 with one small step – human agency, hydrological processes and time in socio-hydrology,  
3 *Hydrol. Earth Syst. Sci.*, 18, 1369-1382, doi:10.5194/hess-18-1369-2014, 2014.

4 Fabricius, C. and Cundill, G.: Learning in adaptive management: insights from published  
5 practice. *Ecology and Society* 19(1): 29, <http://dx.doi.org/10.5751/ES-06263-190129>, 2014.

6 Falkenmark, M., Fox, P., Persson, G., and Rockström, J.: Water harvesting for upgrading of  
7 rainfed agriculture, Problem analysis and research needs, Stockholm International Water  
8 Institute, 2001.

9 Farrington, J, Turton, C., and James, A. J.: Participatory watershed development, Challenges  
10 for the twenty-first century, Oxford, Oxford University Press, 1999.

11 Garnett, S. T., Sayer, J., and Du Toit, J.: Improving the effectiveness of interventions to  
12 balance conservation and development: a conceptual framework. *Ecology and Society* 12(1):  
13 2, <http://www.ecologyandsociety.org/vol12/iss1/art2/>, 2007.

14 Gomani. M. C., Mahay, F., Mbilinyi, B., Dietrich, O., and Lischeid, G.: Establishment of a  
15 hydrological monitoring system through a participatory approach in a small tropical  
16 catchment in Tanzania: Learning hydrology from the local people. Proceedings of the  
17 Conference on International Research on Food Security, Natural Resource Management and  
18 Rural Development, October 6-8, 2009, University of Hamburg, 2009.

19 Gurung, T. R., Bousquet, F., and Trébuil, G.: Companion modeling, conflict resolution, and  
20 institution building: sharing irrigation water in the Lingmuteychu Watershed, Bhutan.  
21 *Ecology and Society* 11(2): 36, <http://www.ecologyandsociety.org/vol11/iss2/art36/>, 2006.

22 Hagen, D. and Evju, M.: Using short-term monitoring data to achieve goals in a large-scale  
23 restoration. *Ecology and Society* 18(3): 29, <http://dx.doi.org/10.5751/ES-05769-180329>,  
24 2013.

25 Hamilton S.: Completing the loop: from data to decisions and back to data. *Hydrological*  
26 *Processes* 21: 3105–3106, 2007.

27 Hrachowitz, M., Bohte, R., Mul, M. L., Bogaard, T. A., Savenije, H. H. G., and Uhlenbrook,  
28 S.: On the value of combined event runoff and tracer analysis to improve understanding of  
29 catchment functioning in a data-scarce semi-arid area, *Hydrol. Earth Syst. Sci.*, 15, 2007-  
30 2024, doi:10.5194/hess-15-2007-2011, 2011.



1 Hrachowitz, M., Savenije, H.H.G., Blöschl, G., McDonnell, J.J., Sivapalan, M., Pomeroy,  
2 J.W., Arheimer, B., Blume, T., Clark, M. P., Ehret, U., Fencica, F., Freer, J.E., Gelfan, A.,  
3 Gupta, H.V., Hughes, D.A., Hut, R.W., Montanari, A., Pande, S., Tetzlaff, D., Troch, P.A.,  
4 Uhlenbrook, S., Wagener, T., Winsemius, H.C., Woods, R.A., Zehe, E., and Cudennec, C.: A  
5 decade of Predictions in Ungauged Basins (PUB)—a review, *Hydrological Sciences Journal*,  
6 58:6, 1198-1255, DOI: 10.1080/02626667.2013.803183, 2013.

7 IAP2 (International Association for Public Participation): IAP2 home page.  
8 <http://www.iap2.org>, 2007.

9 Karjalainen, T. P., Rossi, P. M., Ala-aho, P., Eskelinen, R., Reinikainen, K., Kløve, B.,  
10 Pulido-Velazquez, M., and Yang, H.: A decision analysis framework for stakeholder  
11 involvement and learning in groundwater management, *Hydrol. Earth Syst. Sci.*, 17, 5141-  
12 5153, doi:10.5194/hess-17-5141-2013, 2013.

13 Kongo, V. M., Kosgei, J. R., Jewitt, G. P. W., and Lorentz, S.A.: Establishment of a  
14 catchment monitoring network through a participatory approach in a rural community in  
15 South Africa. *Hydrol. Earth Syst. Sci.* 14(12): 2507-2525, 2010.

16 Kosnik, L.: The potential for small scale hydropower development in the US, *Energy Policy*  
17 38(10): 5512-5519, 2010.

18 Kummerow, C., Simpson, J., Thiele, O., Barnes, W., Chang, A.T.C., Stocker, E., Adler, R.F.,  
19 Hou, A., Kakar, R., Wentz, F., Ashcroft, P., Kozu, T., Hong, Y., Okamoto, K., Iguchi, T.,  
20 Kuroiwa, H., Im, E., Haddad, Z., Huffman, G., Ferrier, B., Olson, W. S., Zipser, E., Smith, E.  
21 A., Wilheit, T. T., North, G., Krishnamurti, T., and Nakamura, K.: The status of the Tropical  
22 Rainfall Measuring Mission (TRMM) after two years in orbit. *Journal of Applied*  
23 *Meteorology* 39(12), 2000.

24 Lane, S. N.: Acting, predicting and intervening in a socio-hydrological world, *Hydrol. Earth*  
25 *Syst. Sci.*, 18, 927-952, doi:10.5194/hess-18-927-2014, 2014.

26 Lasage, R., Aerts, J., Mutiso, G.-C., and De Vries, A.: Potential for community based  
27 adaptations to droughts: sand dams in Kitui, Kenya, *Physics and Chemistry of the Earth* 33,  
28 67-73, 2008.

29 Leahy, J.E. and Anderson, D.H.: Trust factors in community–water resource management  
30 agency relationships. *Landscape and urban planning*, 87(2), 100-107, 2008.

1 Linstone, H. A. and Turoff, M. (eds): *The Delphi Method: Techniques and Applications*,  
2 Addison-Wesley, Reading, Massachusetts, 1975.

3 Makurira, H., Savenije, H.H.G., and Uhlenbrook, S.: *Modelling field scale water partitioning*  
4 *using on-site observations in sub-Saharan rainfed agriculture. Hydrology & Earth System*  
5 *Sciences* 14(4), 2010.

6 Mackenzie, J., Tan, P.-L., Hoverman, S., and Baldwin, C.: *The Value and Limitations of*  
7 *Participatory Action Research Methodology. Journal of Hydrology*, 474, 11-12, 2012.

8 McGuire, K. and McDonnell, J.: *Stable isotope tracers in watershed hydrology*, Blackwell  
9 Publishing, Oxford, 2007.

10 Mhizha, A. and Ndiritu, J. G.: *Assessing crop yield benefits from in situ rainwater harvesting*  
11 *through contour ridges in semi-arid Zimbabwe, Physics and Chemistry of the Earth, Parts*  
12 *A/B/C* 66: 123-130, 2013.

13 Mul, M. L., Savenije, H. H. G., and Uhlenbrook, S.: *Spatial rainfall variability and runoff*  
14 *response during an extreme event in a semi-arid catchment in the South Pare Mountains,*  
15 *Tanzania, Hydrol. Earth Syst. Sci.*, 13, 1659–1670, doi:10.5194/hess-13-1659-2009, 2009.

16 Phalla, C. and Paradis, S.: *Use of Hydrological Knowledge and Community Participation for*  
17 *Improving Decision-making on Irrigation Water Allocation, Working Paper Series No. 49, A*  
18 *CDRI Publication*, 2011.

19 Porchet, M. and Laferrere, H.: *Détermination des caractéristiques hydrodynamiques des sols*  
20 *en place. Mémoire et notes techniques. Annales du Ministère de l’Agriculture, France* 64: 5-  
21 68, 1935.

22 Poolman M.I. *Present & Future: Visualising ideas of water infrastructure design. PhD Thesis*  
23 *Delft University of Technology, the Netherlands*, 2011.

24 Reed, M. S., Evely, A. C., Cundill, G., Fazey, I., Glass, J., Laing, A., Newig, J., Parrish, B.,  
25 Prell, C., Raymond, C., and Stringer, L. C.: *What is social learning? Ecology and Society* 15  
26 (4): r1, <http://www.ecologyandsociety.org/vol15/iss4/resp1/>, 2010.

27 Ritchie, J. C. and McHenry, J. R.: *Application of radioactive fallout cesium-137 for*  
28 *measuring soil erosion and sediment accumulation rates and patterns: a review, Journal of*  
29 *environmental quality* 19(2): 215-233, 1990.

1 Rodela, R., Cundill, G., and Wals, A. E. J.: An analysis of the methodological underpinnings  
2 of social learning research in natural resource management, *Ecol. Econ.*, 77, 16–26, 2012.

3 Rodgers, P., Soulsby, C., Waldron, S., and Tetzlaff, D.: Using stable isotope tracers to assess  
4 hydrological flow paths, residence times and landscape influences in a nested mesoscale  
5 catchment, *Hydrol. Earth Syst. Sci.* 9(3): 139-155, 2005.

6 Sassone, P.G.: *Cost-Benefit Analysis - A Handbook*. Academic Press, New York, USA, 1978.

7 Šimůnek, J., van Genuchten, M. T. and Šejna, M.: Development and Applications of the  
8 HYDRUS and STANMOD Software Packages and Related Codes, *Vadose Zone J.* 7(2): 587-  
9 600, 2008.

10 Singh, G.: *Enhancing growth and biomass production of plantation and associated vegetation  
11 through rainwater harvesting in degraded hills in southern Rajasthan, India*, Springer  
12 Netherlands, 2012.

13 Sivapalan, M., Takeuchi, K., Franks, S. W., Gupta, V. K., Karambiri, H., Lakshmi, V., Liang,  
14 X., McDonnell, J. J., Mendiondo, E. M., O’Connell, P. E., Oki, T., Pomeroy, J. W., Schertzer,  
15 D., Uhlenbrook, S., and Zehe, E.: IAHS Decade on predictions in ungauged basins (PUB),  
16 2003–2012: Shaping an exciting future for the hydrological sciences, *Hydrolog. Sci. J.*, 48,  
17 857–880, 2003.

18 Sivapalan, M., Konar, M., Srinivasan, V., Chhatre, A., Wutich, A., Scott, C. A., Wescoat, J.  
19 L., and Rodríguez-Iturbe, I.: Socio-hydrology: Use-inspired water sustainability science for  
20 the Anthropocene, *Earth’s Future*, 2, 225–230, doi:10.1002/2013EF000164, 2014.

21 Scheer, S.H.: *Communication between irrigation engineers and farmers: the case of project  
22 design in North Senegal*, PhD thesis Landbouwniversiteit Wageningen, 1996.

23 Soulsby, C., Neal, C., Laudon, H., Burns, D. A., Merot, P., Bonell, M., Dunn, S. M., Tetzlaff,  
24 D.: Catchment data for process conceptualization: simply not enough? *Hydrological  
25 Processes* 22 (12), 2057-2061, 2008.

26 Srinivasan, L.: *Tools for Communication Participation: A Manual for Training Trainers in  
27 Participatory Techniques: PROWESS/UNDP-World Bank Water and Sanitation Program*,  
28 1990.

29 Sutherland, R.: Spatial variability of <sup>137</sup>Cs and the influence of sampling on estimates of  
30 sediment redistribution, *Catena* 21(1): 57-71, 1994.

- 1 Sutherland, W. J., Gardner, T., Bogich, T. L., Bradbury, R. B., Clothier, B., Jonsson, M.,  
2 Kapos, V., Lane, S. N., Möller, I., Schroeder, M., Spalding, M., Spencer, T., White, P. C. L.,  
3 and Dicks, L. V.: Solution scanning as a key policy tool: identifying management  
4 interventions to help maintain and enhance regulating ecosystem services. *Ecology and*  
5 *Society* 19(2): 3. <http://dx.doi.org/10.5751/ES-06082-190203>, 2014.
- 6 Tetzlaff, D., Carey, S.K., Laudon, H., and McGuire, K.: Catchment processes and  
7 heterogeneity at multiple scales—benchmarking observations, conceptualization and  
8 prediction, *Hydrological Processes* 24(16): 2203-2208, 2010.
- 9 Van Koppen, B.: Large-Scale and Small-Scale Infrastructure for Growth and Development,  
10 International Water Management Institute, Southern Africa Regional Program, Pretoria, South  
11 Africa, 2009.
- 12 Verbist, K., Cornelis, M. W., Gabriels, D., Alaerts, K., and Soto, G.: Using an inverse  
13 modelling approach to evaluate the water retention in a simple water harvesting technique,  
14 *Hydrol. Earth Syst. Sci. Discuss.* 6(3): 4265-4306, 2009.
- 15 Vincent, L. F.: Towards a smallholder hydrology for equitable and sustainable water  
16 management, *Natural Resources Forum* 27, 108-116. [http://dx.doi.org/10.1111/1477-](http://dx.doi.org/10.1111/1477-8947.00046)  
17 [8947.00046](http://dx.doi.org/10.1111/1477-8947.00046), 2003.
- 18 Von Korff, Y., Daniell, K. A., Moellenkamp, S., Bots, P., and Bijlsma, R. M.: 2012.  
19 Implementing participatory water management: recent advances in theory, practice, and  
20 evaluation. *Ecology and Society* 17(1): 30. <http://dx.doi.org/10.5751/ES-04733-170130>, 2012.
- 21 Walling, D. E. and Quine, T. A.: Use of <sup>137</sup>Cs measurements to investigate soil erosion on  
22 arable fields in the UK: potential applications and limitations, *Journal of Soil Science* 42(1):  
23 147-165, 1991.
- 24 Wallbrink, P. J., Olley, J. M., and Murray, A. S.: Relating suspended sediment to its original  
25 soil depth using fallout radionuclides, *Soil Science Society of America Journal* 63(2): 369-  
26 378, 1999.
- 27 Warner, D. B. and Abate, C. G.: Guidelines for the Development of Small-Scale Rural Water  
28 Supply and Sanitation Projects in East Africa, Catholic Relief Services, Nairobi, Kenya, 2005.

1 Winsemius, H.: Interactive comment on “HESS Opinions “Urgent water challenges are not  
2 sufficiently researched”” by P. van der Zaag et al., Hydrol. Earth Syst. Sci. Discuss., 6, C342–  
3 C345, 2009.

4 Zapata, F.: The use of environmental radionuclides as tracers in soil erosion and  
5 sedimentation investigations: recent advances and future developments, Soil and Tillage  
6 Research 69(1): 3-13, 2003.

7  
8

1 Table 1. Time periods of three hydrological intervention-based research projects

| Case study | Intervention   |                | Hydrological research |              |
|------------|----------------|----------------|-----------------------|--------------|
|            | Start          | End            | Start                 | End          |
| Vietnam    | October 2007   | September 2008 | October 2007          | March 2011   |
| Kenya      | 2002           | 2003           | September 2010        | March 2012   |
| Indonesia  | September 2012 | September 2013 | July 2010             | October 2011 |

2

3 Table 2. Evaluation of technical approaches: gain versus expenditure Vietnam case

| Parameter             | Method                                      | Gain    |       | Expenditure |      | Problems                               |
|-----------------------|---------------------------------------------|---------|-------|-------------|------|----------------------------------------|
|                       |                                             | Process | Model | Labour      | Cost |                                        |
| Rainfall              | Tipping bucket                              | ++      | +     | +/-         | +++  | Clogging due to fine sand & logger     |
| Soil moisture         | TDR (with 8 access tubes)                   | +/-     | +/-   | ++          | +++  | Prone to vandalism                     |
| Vertical flow path    | Dye tracer                                  | ++      | ++    | +/-         | +/-  | Destructive sampling                   |
| Soil physics          | Lab analysis                                | ++      | ++    | +/-         | +    | Point data, lack of deeper samples     |
| Infiltration capacity | Inverse auger test                          | ++      | ++    | +/-         | +    | Point data                             |
| Water level           | Meter height reading                        | +++     | +++   | +/-         | +/-  | Point data                             |
| Groundwater level     | Observation well<br>(reached bedrock depth) | +++     | +++   | +           | +++  | Point data & divers prone to vandalism |
| Isotope tracer        | Lab analysis                                | +++     | ++    | +           | +++  | Short period of sampling               |

Notes:

(+) positive rating = greater gain

4

5 Table 3. Evaluation of the technical approaches: gain versus expenditure Kenya case

| Parameter               | Method                    | Gain    |       | Expenditure |      | Problems                        |
|-------------------------|---------------------------|---------|-------|-------------|------|---------------------------------|
|                         |                           | Process | Model | Labour      | Cost |                                 |
| Rainfall                | Tipping bucket            | ++      | +     | +           | +++  | Logger & removal                |
|                         | TRMM (remote sensing)     | ++      | ++    | -           | -    | Low resolution                  |
| Soil moisture           | TDR (with 6 access tubes) | +/-     | +/-   | +++         | +++  | Point data & prone to vandalism |
| Soil physics            | Lab analysis              | ++      | ++    | +           | +/-  | Sample composition              |
| Greenness index         | NDVI (remote sensing)     | ++      | ++    | -           | -    | Low resolution                  |
| Erosion & sedimentation | Cs analysis               | ++      | ++    | +           | +++  | Reference point                 |

Notes:

(+) positive rating = greater gain

6

7 Table 4. Evaluation of the technical approaches: gain versus expenditure Indonesia case

| Parameter | Method               | Gain    |       | Expenditure |      | Problems          |
|-----------|----------------------|---------|-------|-------------|------|-------------------|
|           |                      | Process | Model | Labour      | Cost |                   |
| Rainfall  | Tipping bucket       | ++      | ++    | +/-         | +++  | Logger            |
| Discharge | Velocity area        | ++      | ++    | +/-         | +++  | Logger            |
|           | Dilution gauging     | ++      | ++    | +/-         | +/-  | Short measurement |
| Head      | DEM (remote sensing) | ++      | ++    | -           | -    | Low resolution    |

Notes:

(+) positive rating = greater gain

8

9

1 Table A.1. Vietnam case; hydrological research

| <b>Procedure</b> (the official way of conducting hydrological research) | <b>Event or observation</b> (an indisputable happening) | <b>Action</b> (the process before an event)                             | <b>Interpretation</b> (giving a meaning of the event and/or action to research) | <b>Period</b>                    |
|-------------------------------------------------------------------------|---------------------------------------------------------|-------------------------------------------------------------------------|---------------------------------------------------------------------------------|----------------------------------|
| Install two rain gauges                                                 | Intermittent rainfall data                              | -                                                                       | -                                                                               | October 2007-March 2011          |
|                                                                         | Clogged rain gauges [#1]                                | Need of checks and maintenance                                          | Loss of rainfall data series                                                    | October 2008                     |
|                                                                         | Logger failed to record events [#2]                     | Tried to retrieved data from manufacture company and manual measurement | Loss of rainfall data series                                                    | December 2009-March 2011         |
| Install access tubes for soil moisture measurements                     | Loss of access tubes [#3]                               | Substituted with new access tubes                                       | Loss of soil moisture data series, extra costs for new tubes                    | September 2008-March 2011        |
| Check infiltration at the bottom of the trench                          | -                                                       | -                                                                       | -                                                                               | September 2009-<br>November 2009 |
| Measure soil porosity and bulk density                                  | -                                                       | -                                                                       | -                                                                               | October 2007-June 2009           |
| Measure infiltration capacity                                           | -                                                       | -                                                                       | -                                                                               | October 2007 & April 2009        |
| Measure surface water level in the trenches during wet season           | -                                                       | -                                                                       | -                                                                               | October 2007 - November 2009     |
| Construct observation wells                                             | Loss of divers [#4]                                     | Perform manual measurement                                              | Loss in groundwater level data series                                           | December 2007                    |
|                                                                         | Improper screen instalment for isotope sampling [#5]    | Nothing                                                                 | Possible misinterpretation of isotope signal                                    | October 2007 & April 2009        |
|                                                                         | Construction before intervention [#6]                   | Extra costs for constructing new wells                                  | A shift in location of intervention requires more measurements, thus more cost  | October 2007-April 2009          |

2  
3

1 Table A.2. Vietnam case; intervention

| <b>Procedure</b> (the common way of intervention)                        | <b>Event or observation</b> (an indisputable happening)                                                         | <b>Action</b> (the process before an event)                                                 | <b>Interpretation</b> (giving a meaning of the event and/or action to intervention)          | <b>Period</b>              |
|--------------------------------------------------------------------------|-----------------------------------------------------------------------------------------------------------------|---------------------------------------------------------------------------------------------|----------------------------------------------------------------------------------------------|----------------------------|
| Introducing the concept of intervention to local authority and community | Meetings                                                                                                        | Presentations and discussions to obtain support                                             | Needed an agreement from local community                                                     | May 2006 - September 2007  |
| Constructing contour trenches [#6A]                                      | A monks' organization provided their land in a size of 12 ha for intervention                                   | Larger trenches were constructed on 8 ha area                                               | Needed an agreement on someone's land to be interfered                                       | October 2007               |
|                                                                          | After large contour trenching, the monks' organization refused to continue construction on their remaining land | Meetings and discussions to convince the intervention would be beneficial for the community | Although the monks gave permission for large contour trenching, they did not like the design | November 2007 - March 2008 |
|                                                                          | The proposer approached other land owners                                                                       | The proposer offered a smaller contour trench design                                        | Negotiated on the design                                                                     | March 2008                 |
|                                                                          | A local farmer excepted the smaller trench design                                                               | Construction of smaller contour trenches on 1 ha area                                       | The smaller design was tested                                                                | April 2008 - May 2008      |
|                                                                          | Other local farmers requested smaller contour trenching.                                                        | Construction of smaller contour trenches on other farmers' land (10 ha)                     | The smaller design was preferred                                                             | June 2008 - August 2008    |
|                                                                          | The monks' organization also provided their remaining land for smaller contour trenching                        | Construction of smaller contour trenches on the remaining 4 ha area.                        | Overall in this particular local community, a larger design was not accepted.                | June 2008 - August 2008    |

2

3



1 Table A.3. Kenya case; hydrological research

| <b>Procedure</b> (the official way of conducting hydrological research) | <b>Event</b> or observation (an indisputable happening)                       | <b>Action</b> (the process before an event)                                                        | <b>Interpretation</b> (giving a meaning or impact of the event to research) | <b>Period</b>             |
|-------------------------------------------------------------------------|-------------------------------------------------------------------------------|----------------------------------------------------------------------------------------------------|-----------------------------------------------------------------------------|---------------------------|
| Install two rain gauges                                                 | One rain gauge was damaged by elephants and thus removed by local people [#7] | Information came very late, thus arrangement for reset up of the rain gauge could not be performed | Loss of rainfall data series                                                | September 2010-March 2012 |
|                                                                         | One logger failed to record events [#8]                                       | Tried to retrieve data without success                                                             | Loss of rainfall data series                                                | September 2010-March 2012 |
| Soil moisture measurements to be conducted by a local person            | A long negotiation to start measurement was not successful [#9]               | Established new connection with other local people was not successful too                          | Loss of soil moisture data series                                           | September 2010-March 2013 |
|                                                                         | Loss of access tubes [#9A]                                                    | Installed two remaining tubes                                                                      | Loss of soil moisture data series                                           | September 2010-March 2012 |
| Used TRMM & NDVI analysis                                               | -                                                                             | -                                                                                                  | -                                                                           | January 2011-March 2011   |
| Measure soil porosity and bulk density                                  | -                                                                             | -                                                                                                  | -                                                                           | September 2010            |
| Soil sampling for Cesium analysis                                       | -                                                                             | -                                                                                                  | -                                                                           | September 2010            |

2

3 Table A.4. Kenya case; intervention

| <b>Procedure</b> (the common way of intervention)                        | <b>Event or observation</b> (an indisputable happening) | <b>Action</b> (the process before an event)                                         | <b>Interpretation</b> (giving a meaning of the event and/or action to intervention) | <b>Period</b> |
|--------------------------------------------------------------------------|---------------------------------------------------------|-------------------------------------------------------------------------------------|-------------------------------------------------------------------------------------|---------------|
| Introducing the concept of intervention to local authority and community | Meetings                                                | Convincing local people with success                                                | Local people accepted the design                                                    | 2001-2002     |
| Constructing contour trenches                                            | The majority of Maasai supported contour trenches       | Trenches were first constructed in smaller dimension and furthermore in larger ones | Easy to implement different dimension of contour trenching in this particular area  | 2002-2006     |
| After construction of large contour trenches                             | -                                                       | -                                                                                   | -                                                                                   | 2002-present  |

4

5

1 Table A.5. Indonesia case; hydrological research

| <b>Procedure</b> (the official way of conducting hydrological research) | <b>Event</b> or observation (an indisputable happening) | <b>Action</b> (the process before an event) | <b>Interpretation</b> (giving a meaning or impact of the event to research) | <b>Period</b>            |
|-------------------------------------------------------------------------|---------------------------------------------------------|---------------------------------------------|-----------------------------------------------------------------------------|--------------------------|
| Install two rain gauges                                                 | One logger failed to record events [#10]                | Only counted on one logger                  | Loss of rainfall data series                                                | July 2010-July 2011      |
| Install two divers                                                      | One logger failed to record events [#11]                | Only count on one diver                     | Loss of water level data series                                             | July 2010-July 2011      |
| Measure discharge using dilution method and velocity area               | -                                                       | -                                           | -                                                                           | February 2011-March 2011 |
| Used DEM analysis                                                       | -                                                       | -                                           | -                                                                           | April 2011-June 2011     |

2

3 Table A.6. Indonesia case; intervention

| <b>Procedure</b> (the common way of intervention)      | <b>Event</b> or <b>observation</b> (an indisputable happening)                                                        | <b>Action</b> (the process before an event)            | <b>Interpretation</b> (giving a meaning of the event and/or action to intervention) | <b>Period</b>                 |
|--------------------------------------------------------|-----------------------------------------------------------------------------------------------------------------------|--------------------------------------------------------|-------------------------------------------------------------------------------------|-------------------------------|
| Proposed intervention to local authority and community | Meetings, permit issue, estimation of micro hydro budget and research on its potential                                | -                                                      | -                                                                                   | March 2010-June 2011          |
| Design suitable micro hydro installation               | Two plans were agreed; first an installation of about 80kW and second small kW was estimated after the research       | Search for extra funding to meet the construction cost | A decision had to be made based on the availability of funding                      | July 2010-January 2012        |
| Pilot result                                           | Research result suggests little potential for micro-hydro installation in a village, but funding was still not enough | Constructed micro-hydro model for a local university   | The final intervention shifted from a pilot to a model                              | September 2012-September 2013 |

4

5

1 Table B.1. Vietnam Case, Scenario 1: to measure rainfall and groundwater level for a short  
 2 period

| Parameter             | Method                                        | Number /<br>Samples | Labour | In Euro        | Cost       | In Euro         |              |
|-----------------------|-----------------------------------------------|---------------------|--------|----------------|------------|-----------------|--------------|
| Rainfall              | Tipping bucket                                | 2                   | +-     | 40             | +++        | 2.015           |              |
| Soil physics          | Lab analysis                                  | 6                   | +-     |                | +          | 238             |              |
| Infiltration capacity | Inversed auger test                           | 8                   | +-     |                | +          | 75              |              |
| Water level           | Meter height reading                          | 13                  | +      |                | +-         | 15              |              |
| Groundwater level     | Observation well & diver<br>(reached bedrock) | 3                   | ++     | 720            | +++        | 5.533           |              |
|                       |                                               |                     |        | <b>Total I</b> | <b>760</b> | <b>Total II</b> | <b>7.876</b> |

3

4 Notes:

5 (+-) = 0 - 50 Euro, (+) = 50 - 250 Euro, (++) = 250 - 750 Euro, (+++) above 750 Euro

6

7 Table B.2. Vietnam Case, Scenario 2: to recheck the signal of recharge

| Parameter             | Method                                        | Number /<br>Samples | Labour | In Euro        | Cost         | In Euro         |               |
|-----------------------|-----------------------------------------------|---------------------|--------|----------------|--------------|-----------------|---------------|
| Rainfall              | Tipping bucket                                | 2                   | +-     | 40             | +++          | 2.015           |               |
| Soil moisture         | TDR (with access tubes)                       | 8                   | +++    | 2.160          | +++          | 4.717           |               |
| Vertical flow path    | Dye tracer                                    | 3                   | +-     |                | +-           | 10              |               |
| Soil physics          | Lab analysis                                  | 6                   | +-     |                | +            | 238             |               |
| Infiltration capacity | Inversed auger test                           | 8                   | +-     |                | +            | 75              |               |
| Water level           | Meter height reading                          | 13                  | +-     |                | +-           | 15              |               |
| Groundwater level     | Observation well & diver<br>(reached bedrock) | 7 + 1               | ++     |                | +++          | 13.893          |               |
| Isotope tracer        | Lab analysis                                  | 116 + 116           | +      |                | +++          | 1.856           |               |
|                       |                                               |                     |        | <b>Total I</b> | <b>2.200</b> | <b>Total II</b> | <b>22.819</b> |

8

9 Notes:

10 (+-) = 0 - 50 Euro, (+) = 50 - 250 Euro, (++) = 250 - 750 Euro, (+++) above 750 Euro

11

1 Table B.3. Vietnam Case, Scenario 3: to map the subsurface

| Parameter             | Method                                        | Number /<br>Samples | Labour | In Euro        | Cost         | In Euro         |               |
|-----------------------|-----------------------------------------------|---------------------|--------|----------------|--------------|-----------------|---------------|
| Rainfall              | Tipping bucket                                | 2                   | + -    | 40             | +++          | 2.015           |               |
| Soil moisture         | TDR (with access tubes)                       | 8                   | +++    | 2.160          | +++          | 4.717           |               |
| Vertical flow path    | Dye tracer                                    | 3                   | + -    |                | + -          | 10              |               |
| Soil physics          | Lab analysis                                  | 6                   | + -    |                | +            | 238             |               |
| Infiltration capacity | Inversed auger test                           | 8                   | + -    |                | +            | 75              |               |
| Water level           | Meter height reading                          | 13                  | + -    |                | + -          | 15              |               |
| Groundwater level     | Observation well & diver<br>(reached bedrock) | 7 + 4               | +      |                | +++          | 18.909          |               |
| Isotope tracer        | Lab analysis                                  | 116 + 116           | +      |                | +++          | 928             |               |
| Subsurface mapping    | ERT                                           | 4                   |        | 2.000          | +++          | 10.000          |               |
|                       |                                               |                     |        | <b>Total I</b> | <b>4.200</b> | <b>Total II</b> | <b>36.907</b> |

2

3 Notes:

4 (+-) = 0 - 50 Euro, (+) = 50 - 250 Euro, (++) = 250 - 750 Euro, (+++) above 750 Euro

5

6 Table B.4. Kenya Case, Scenario 1: to use remote sensing data

| Parameter       | Method                  | Number / Samples | Labour | In Euro        | Cost       | In Euro         |              |
|-----------------|-------------------------|------------------|--------|----------------|------------|-----------------|--------------|
| Rainfall        | Tipping bucket          | 2                | +      | 120            | +++        | 1.305           |              |
|                 | Remote sensing analysis |                  | -      |                | -          |                 |              |
| Greenness index | Remote sensing analysis |                  | -      |                | -          |                 |              |
|                 |                         |                  |        | <b>Total I</b> | <b>120</b> | <b>Total II</b> | <b>1.305</b> |

7

8 Notes:

9 (+-) = 0 - 50 Euro, (+) = 50 - 250 Euro, (++) = 250 - 750 Euro, (+++) above 750 Euro

10

11 Table B.5. Kenya Case, Scenario 2: to retry one year soil moisture measurement

| Parameter               | Method                  | Number /<br>Samples | Labour | In Euro        | Cost         | In Euro         |              |
|-------------------------|-------------------------|---------------------|--------|----------------|--------------|-----------------|--------------|
| Rainfall                | Tipping bucket          | 2                   | +      | 120            | +++          | 1.305           |              |
|                         | Remote sensing analysis |                     | -      |                | -            |                 |              |
| Soil moisture           | TDR (with access tubes) | 6                   | +++    | 2.880          | +++          | 4.990           |              |
| Soil physics            | Lab analysis            | 8                   | + -    | 40             | + -          |                 |              |
| Greenness index         | Remote sensing analysis |                     | -      |                | -            |                 |              |
| Erosion & sedimentation | Cs analysis             | 128                 | +      | 100            | +++          | 1.699           |              |
|                         |                         |                     |        | <b>Total I</b> | <b>3.140</b> | <b>Total II</b> | <b>7.994</b> |

12

13 Notes:

14 (+-) = 0 - 50 Euro, (+) = 50 - 250 Euro, (++) = 250 - 750 Euro, (+++) above 750 Euro

15

16

1 Table B.6. Kenya Case, Scenario 3: to maximize remote sensing analysis

| Parameter                       | Method                  | Number /<br>Samples | In Euro        |              | In Euro         |               |
|---------------------------------|-------------------------|---------------------|----------------|--------------|-----------------|---------------|
|                                 |                         |                     | Labour         | Cost         |                 |               |
| Rainfall                        | Tipping bucket          | 2                   | +              | 120          | 1.305           |               |
|                                 | Remote sensing analysis |                     | -              |              |                 |               |
| Soil moisture                   | TDR (with access tubes) | 6                   | +++            | 2.880        | 4.990           |               |
| Soil physics                    | Lab analysis            | 8                   | +              | 40           |                 |               |
| Greenness index                 | Remote sensing analysis |                     | -              |              |                 |               |
| Erosion & sedimentation         | Cs analysis             | 128                 | +              | 100          | 1.699           |               |
| High resolution greenness index | Remote sensing analysis |                     | -              |              | 8.400           |               |
|                                 |                         |                     | <b>Total I</b> | <b>3.140</b> | <b>Total II</b> | <b>16.394</b> |

2

3 Notes:

4 (+-) = 0 - 50 Euro, (+) = 50 - 250 Euro, (++) = 250 - 750 Euro, (+++) above 750 Euro

5

6 Table B.7. Indonesia case, Scenario 1: to measure discharge of one river for one year

| Parameter | Method                  | Number / Samples | In Euro        |           | In Euro         |              |
|-----------|-------------------------|------------------|----------------|-----------|-----------------|--------------|
|           |                         |                  | Labour         | Cost      |                 |              |
| Discharge | Velocity area (diver)   | 3                | +/-            | +++       | 1.500           |              |
|           | Dilution gauging        |                  | +/-            | +/-       | 25              |              |
| Head      | Remote sensing analysis |                  | -              | -         |                 |              |
|           |                         |                  | <b>Total I</b> | <b>50</b> | <b>Total II</b> | <b>1.525</b> |

7

8 Notes:

9 (+-) = 0 - 50 Euro, (+) = 50 - 250 Euro, (++) = 250 - 750 Euro, (+++) above 750 Euro

10

11 Table B.8. Indonesia case, Scenario 2: to investigate discharge of another river

| Parameter | Method                  | Number / Samples | In Euro        |           | In Euro         |              |
|-----------|-------------------------|------------------|----------------|-----------|-----------------|--------------|
|           |                         |                  | Labour         | Cost      |                 |              |
| Rainfall  | Tipping bucket          | 2                | +/-            | 50        | 1.990           |              |
| Discharge | Velocity area (diver)   | 3 + 2            | +/-            | +++       | 2.500           |              |
|           | Dilution gauging        |                  | +/-            | +/-       | 25              |              |
| Head      | Remote sensing analysis |                  | -              | -         |                 |              |
|           |                         |                  | <b>Total I</b> | <b>50</b> | <b>Total II</b> | <b>4.515</b> |

12 Notes:

13 (+-) = 0 - 50 Euro, (+) = 50 - 250 Euro, (++) = 250 - 750 Euro, (+++) above 750 Euro

14

15

1 Table B.9. Indonesia case, Scenario 3: to investigate discharges of four other rivers

| Parameter | Method                  | Number / Samples | Labour | In Euro        | Cost      | In Euro         |              |
|-----------|-------------------------|------------------|--------|----------------|-----------|-----------------|--------------|
| Rainfall  | Tipping bucket          | 2                | + -    | 50             | +++       | 1.990           |              |
| Discharge | Velocity area (diver)   | 3 + 8            | + -    |                | +++       | 5.500           |              |
|           | Dilution gauging        |                  | + -    |                | + -       | 25              |              |
| Head      | Remote sensing analysis |                  | -      |                | -         |                 |              |
|           |                         |                  |        | <b>Total I</b> | <b>50</b> | <b>Total II</b> | <b>7.515</b> |

2

3 Notes:

4 (+-) = 0 - 50 Euro, (+) = 50 - 250 Euro, (++) = 250 - 750 Euro, (+++) above 750 Euro

5

1 Table C.1. Vietnam case; the experts' opinions

| No | Title | Institution        | Scenario 2 |                                                                                                                        | Scenario 3 |                                                                                  | Other suggestions                                                                                                                                                                |
|----|-------|--------------------|------------|------------------------------------------------------------------------------------------------------------------------|------------|----------------------------------------------------------------------------------|----------------------------------------------------------------------------------------------------------------------------------------------------------------------------------|
|    |       |                    | Grade      | Remarks                                                                                                                | Grade      | Remarks                                                                          | Remarks                                                                                                                                                                          |
| 1  | PhD   | Utrecht University | 7          | Seasonality is already included                                                                                        | 7          | Disadvantage: profiles measured only one time                                    | Require 10 year groundwater level data                                                                                                                                           |
| 2  | MSc   | Delft University   | 8          | Measure for at least 2 years                                                                                           | 8.5        | Model only tests hypothesis. Measurements already answered the research question | -                                                                                                                                                                                |
| 3  | MSc   | Delft University   | 7          | Isotope is an advance method with good result                                                                          | 7          | One time measurement equals to nothing                                           | To study the unsaturated zone, to measure rate of recharge using SM sensors etc                                                                                                  |
| 4  | PhD   | Delft University   | 8          | Need validation and try to get more confidence or to decrease uncertainty. But it could even lead to confusing results | 8          | Hard to interpret                                                                | Depending on Ks and soil moisture. Challenging (qualitative result): infiltration test and surface water measurements                                                            |
| 5  | PhD   | Delft University   | 7          | Sceptic                                                                                                                | 8          | -                                                                                | -                                                                                                                                                                                |
| 6  | Prof  | UNESCO-IHE         | 7.5        | -                                                                                                                      | 8          | -                                                                                | -                                                                                                                                                                                |
| 7  | PhD   | UNESCO-IHE         | 7.5        | -                                                                                                                      | 8          | Increase resistivity of water by injecting sodium chloride                       | More artificial tracer, (yellow dye), soil moisture measurement below the trench (use cheap sensors like Decagon). A need of timely scale measurements or time laps measurements |
| 8  | PhD   | Delft University   | 8          | -                                                                                                                      | 8          | -                                                                                | Previous measurements were already sufficient                                                                                                                                    |
| 9  | MSc   | Eindhoven-Deltares | 7          | -                                                                                                                      | 8          | -                                                                                | It would be an advantage to have 3-D                                                                                                                                             |
| 10 | PhD   | Delft University   | 7.5        | -                                                                                                                      | 8          | Expensive (cost magnitude about 10.000 to 30.000 Euro for a 5 m interval)        | Geophysical approach for spatial information. Soil type analysis, ground radar method, and 1-2 points tracer (pollution)                                                         |

2

3

1 Table C.2. Kenyan case; the experts' opinions

| No | Title | Institution        | Scenario 2 |                                                                           | Scenario 3 |                      | Other suggestions                                                                                                                                         |
|----|-------|--------------------|------------|---------------------------------------------------------------------------|------------|----------------------|-----------------------------------------------------------------------------------------------------------------------------------------------------------|
|    |       |                    | Grade      | Remarks                                                                   | Grade      | Remarks              | Remarks                                                                                                                                                   |
| 1  | PhD   | Utrecht University | 7          | NDVI related to temperature, LAI, but does not correlate to soil moisture | 7          | -                    | Try FPAR (Fractional Photosynthetically Active Radiation)                                                                                                 |
| 2  | MSc   | Delft University   | 7.5        | -                                                                         | 8.5        | -                    | Soil temperature measurement to estimate evaporation.                                                                                                     |
| 3  | MSc   | Delft University   | 7          | Enough                                                                    | 7          | Enough               | -                                                                                                                                                         |
| 4  | PhD   | Delft University   | 8          | -                                                                         | 8          | -                    | Aerial photos, LAI (although it is difficult)                                                                                                             |
| 5  | PhD   | Delft University   | 8          | -                                                                         | 8          | -                    | Try to measure discharge, modelling the impact of soil moisture & transpiration                                                                           |
| 6  | Prof  | UNESCO-IHE         | 8          | -                                                                         | 8          | -                    | Discharge measurements (notches) to close the detail water balance, micro station especially evaporation                                                  |
| 7  | PhD   | UNESCO-IHE         | 7          | -                                                                         | 7.5        | -                    | Plant's physiological effects like water stress.                                                                                                          |
| 8  | MSc   | Delft University   | 7          | -                                                                         | 8          | -                    | A higher resolution is usually better.                                                                                                                    |
| 9  | MSc   | Eindhoven-Deltares | 8          | -                                                                         | 8.5        | -                    | -                                                                                                                                                         |
| 10 | PhD   | Delft University   | 7.5        | -                                                                         | 8          | Try to see sub pixel | Pixel variability (to minimize the interval of images). Sensors for spectrometer through cable trolley/station and aerial photos (for more detail images) |

2  
3



1 Table C.3. Indonesian case; the experts' opinions

| No | Title | Institution        | Scenario 2 |                                                              | Scenario 3 |                                                                                                                                                     | Other suggestions                                                                                                                                                                                          |
|----|-------|--------------------|------------|--------------------------------------------------------------|------------|-----------------------------------------------------------------------------------------------------------------------------------------------------|------------------------------------------------------------------------------------------------------------------------------------------------------------------------------------------------------------|
|    |       |                    | Grade      | Remarks                                                      | Grade      | Remarks                                                                                                                                             | Remarks                                                                                                                                                                                                    |
| 1  | PhD   | Utrecht University | 7          | Absolut value is enough                                      | 7          | -                                                                                                                                                   | -                                                                                                                                                                                                          |
| 2  | MSc   | Delft University   | 7.5        | Reach a statistical information of regime                    | 7.5        | Reach a statistical information of regime                                                                                                           | -                                                                                                                                                                                                          |
| 3  | MSc   | Delft University   | 7          | -                                                            | 7          | -                                                                                                                                                   | -                                                                                                                                                                                                          |
| 4  | PhD   | Delft University   | 8          | With more data we can get new or not increased understanding | 8          | Spatial information is important                                                                                                                    | Integrate geology and other point measurements at other rivers                                                                                                                                             |
| 5  | PhD   | Delft University   | 7          | Hydrology engineering                                        | 8          | Measure at more various areas. Start by investigating maps of the different factors; geological, topographical, vegetation, and boundary condition. | More variability means more recommendation to result in a catchment classification with certain discharges, but maybe diverse catchments are depended only on landscape and geology                        |
| 6  | Prof  | UNESCO-IHE         | 7          | -                                                            | 8          | -                                                                                                                                                   | Higher resolution of DEM.                                                                                                                                                                                  |
| 7  | PhD   | UNESCO-IHE         | 7.5        | -                                                            | 8          | -                                                                                                                                                   | Maps or information on internet: meteorological data (rainfall & temperature) DEM, soil, geology, & land use. Multiple regression (Q)                                                                      |
| 8  | PhD   | Delft University   | 7          | -                                                            | 8          | -                                                                                                                                                   | Map of the basin. Field survey on all potential places based on the distance from the village etc. Socio-economic studies to answer where to build a MHPP.                                                 |
| 9  | MSc   | Eindhoven-Deltares | 7          | -                                                            | 8          | -                                                                                                                                                   | Geology and land use map.                                                                                                                                                                                  |
| 10 | PhD   | Delft University   | 7          | -                                                            | 7          | -                                                                                                                                                   | Not important in hydrological science, but just as hydrological measurement. If one goes for uncertainty, then a long time series is needed. A flume (which will be costly) is an option to measure the Q. |

1

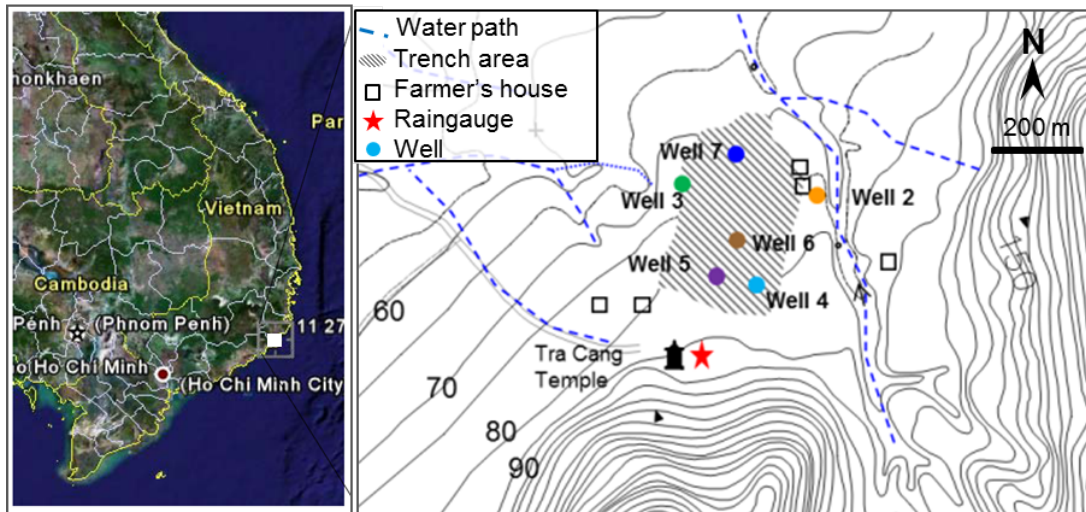

2

3

4

Figure 1. The location of the trenched area, rain gauge, and constructed wells. The study area is the shaded area on the lower map. Source: Local produced map and Google Earth.

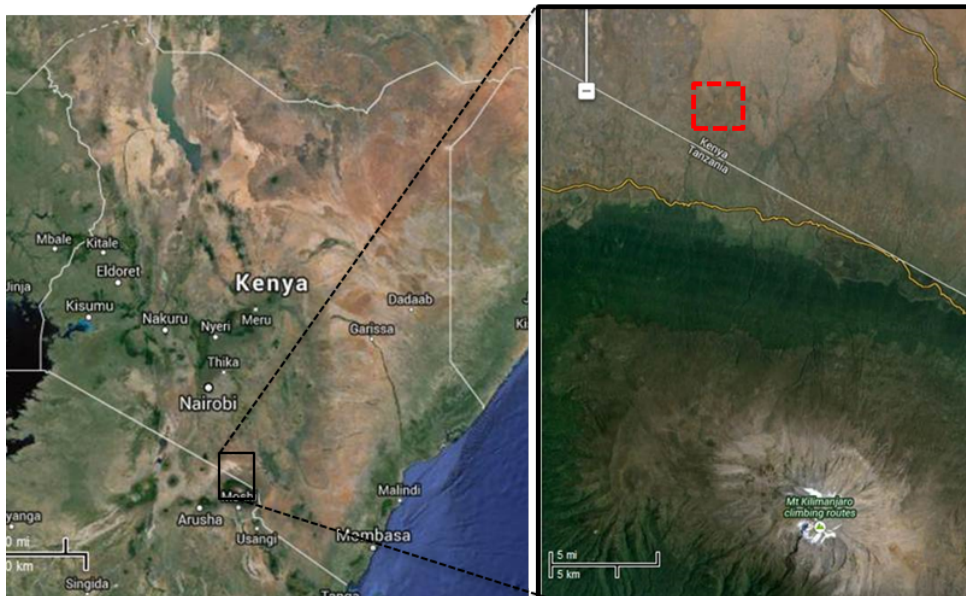

5

6

7

Figure 2. Location of studied contour trenching in Amboseli, Kenya (red dashed line). Source: Google Maps.

1  
2  
3

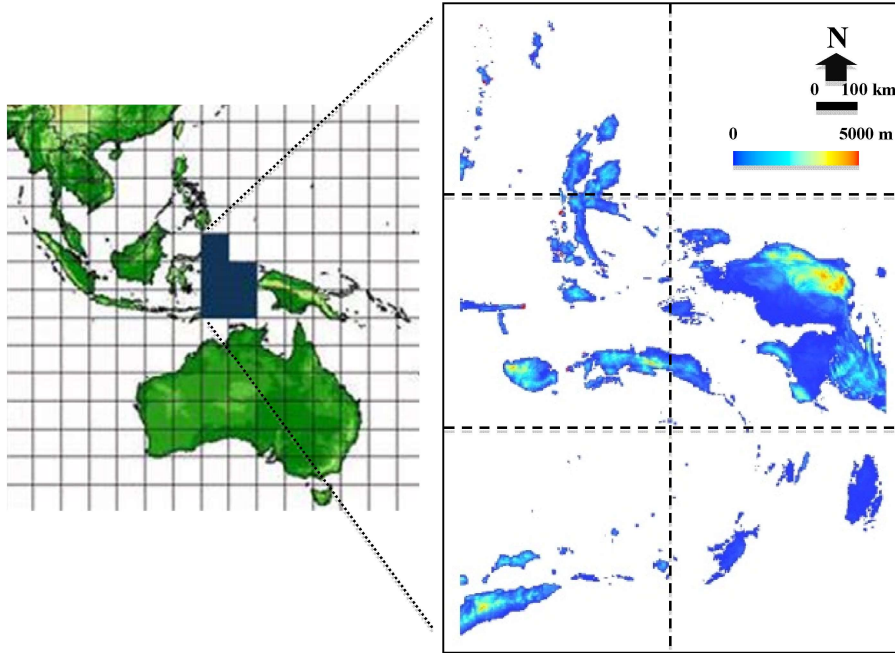

4  
5  
6

Figure 3. The result of merged and processed DEM tiles on Maluku islands.

**SARAR Resistance To Change Continuum**

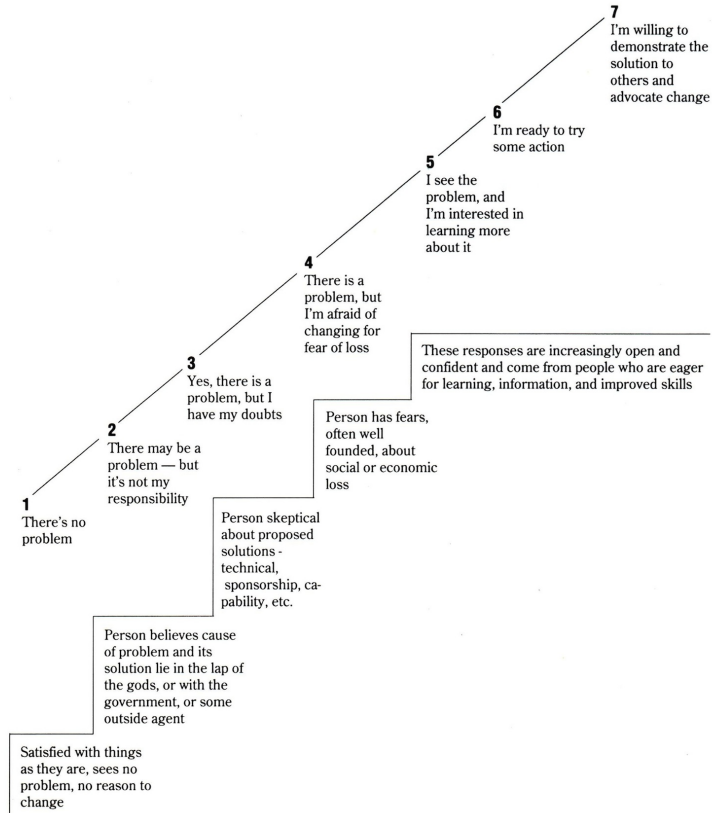

1  
2  
3  
4

Figure 4. The scale of community participation. Source: Srinivasan, 1990, page 162.

**SARAR Resistance To Change Continuum**

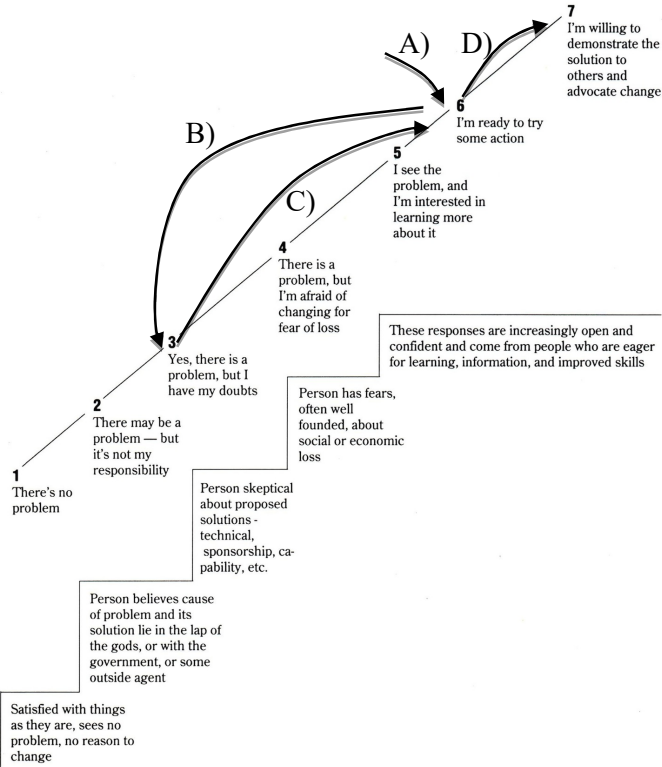

1  
2 Figure 5. The implemented intervention based on the scale of community participation of  
3 Srinivasan (1990).  
4

1

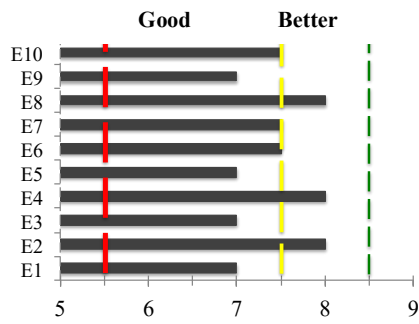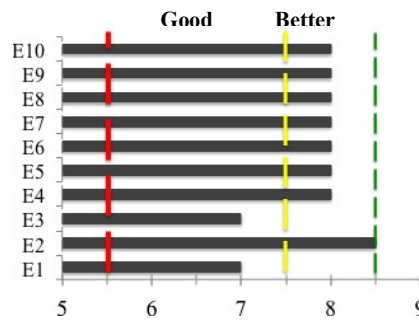

2

3

4

The Vietnam Case

Understanding

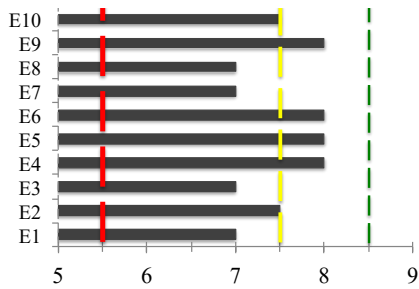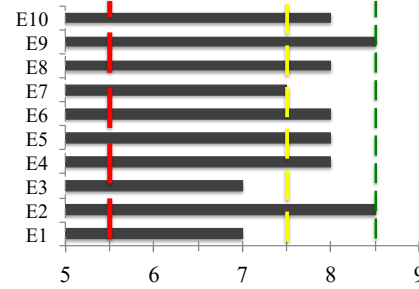

5

6

7

The Kenya Case

Understanding

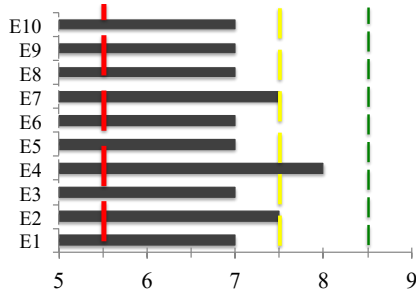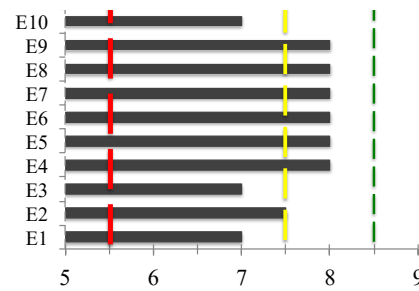

8

9

10

11

12

13

14

The Indonesian Case

Understanding

Red dash line = grade 5.5  
 Yellow dash line = grade 7.5  
 Green dash line = grade 8.5  
 E = expert

15

Figure 6. Summary of three cases; on the left: Scenario 2, right: Scenario 3

16

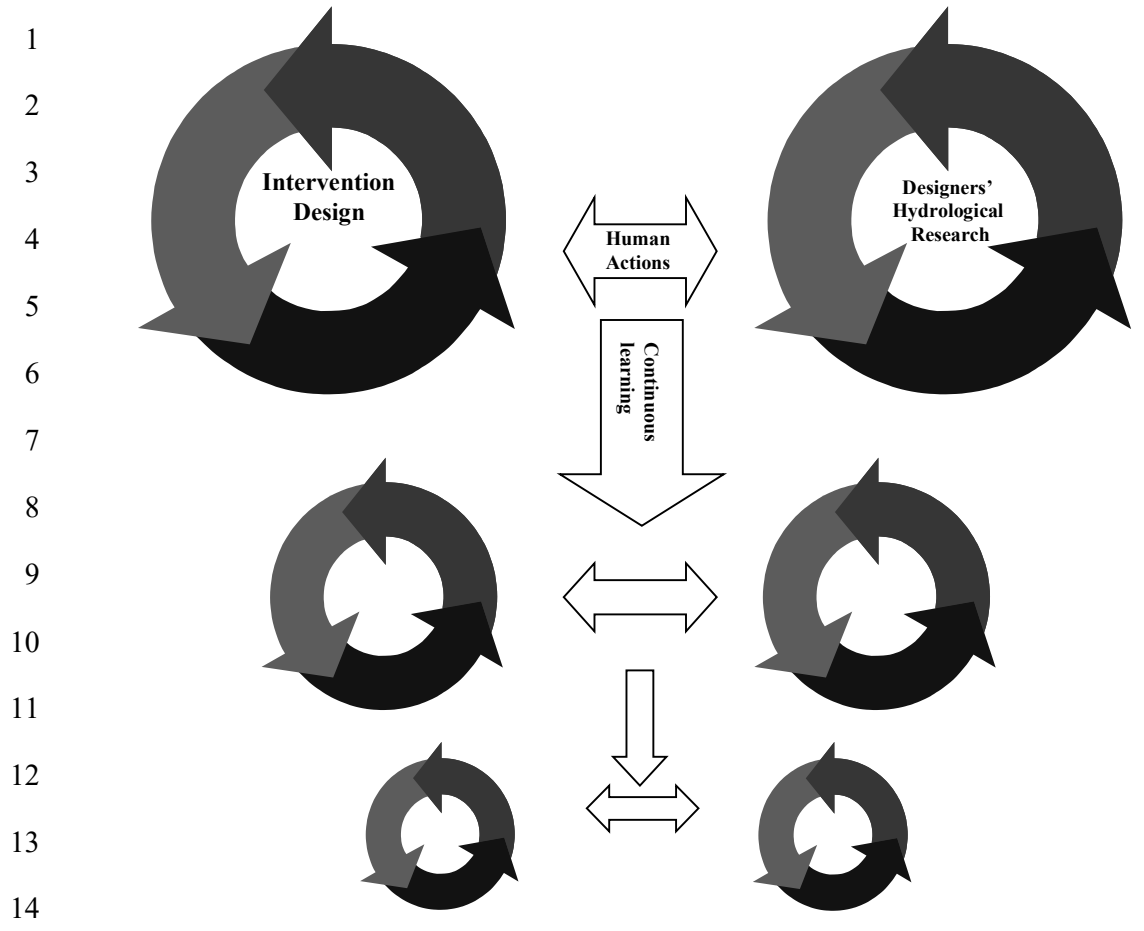

15 Figure 7. Designing hydrological field research in small-scale intervention (modified from  
16 Ertsen (2002) and Scheer (1996))
